# Supplementary material for: Seminoma and Embryonal Carcinoma Footprints Identified by Analysis of Integrated Genome-Wide Epigenetic and Expression Profiles of Germ Cell Cancer Cell Lines
Source: PubMed Central journal article supplement (PMC4041891; doi:10.1371/journal.pone.0098330), 2014-06-02
Supplement: pone.0098330.s007.pdf [file pone.0098330.s007.pdf]

## **Results homer motif enrichments (known motifs)**

NCCIT h3k4me3

## Homer Known Motif Enrichment Results

[Homer de novo Motif Results](#)

[Gene Ontology Enrichment Results](#)

[Known Motif Enrichment Results \(txt file\)](#)

Total Target Sequences = 19015, Total Background Sequences = 26126

| Rank | Motif                                                                               | Name                                          | P-value | log P-pvalue | q-value (Benjamini) | # Target Sequences with Motif | % of Targets Sequences with Motif | # Background Sequences with Motif | % of Background Sequences with Motif | Motif File                          | PDF                 |
|------|-------------------------------------------------------------------------------------|-----------------------------------------------|---------|--------------|---------------------|-------------------------------|-----------------------------------|-----------------------------------|--------------------------------------|-------------------------------------|---------------------|
| 1    |    | Maz(Zf)/HepG2-Maz-ChIP-Seq (GSE31477)/Homer   | 1e-401  | -9.248e+02   | 0.0000              | 16119.0                       | 84.77%                            | 18698.3                           | 71.57%                               | <a href="#">motif file (matrix)</a> | <a href="#">pdf</a> |
| 2    |    | E2F4(E2F)/K562-E2F4-ChIP-Seq (GSE31477)/Homer | 1e-202  | -4.661e+02   | 0.0000              | 9320.0                        | 49.01%                            | 9969.5                            | 38.16%                               | <a href="#">motif file (matrix)</a> | <a href="#">pdf</a> |
| 3    |   | GFY-Staf/Promoters/Homer                      | 1e-201  | -4.637e+02   | 0.0000              | 1572.0                        | 8.27%                             | 922.4                             | 3.53%                                | <a href="#">motif file (matrix)</a> | <a href="#">pdf</a> |
| 4    |    | Elk4(ETS)/Hela-Elk4-ChIP-Seq (GSE31477)/Homer | 1e-187  | -4.323e+02   | 0.0000              | 9136.0                        | 48.05%                            | 9828.3                            | 37.62%                               | <a href="#">motif file (matrix)</a> | <a href="#">pdf</a> |
| 5    |    | Elk1(ETS)/Hela-Elk1-ChIP-Seq (GSE31477)/Homer | 1e-137  | -3.170e+02   | 0.0000              | 8824.0                        | 46.41%                            | 9799.5                            | 37.51%                               | <a href="#">motif file (matrix)</a> | <a href="#">pdf</a> |
| 6    |    | E2F6(E2F)/Hela-E2F6-ChIP-Seq (GSE31477)/Homer | 1e-132  | -3.053e+02   | 0.0000              | 10283.0                       | 54.08%                            | 11806.7                           | 45.19%                               | <a href="#">motif file (matrix)</a> | <a href="#">pdf</a> |
| 7    |  | Fli1(ETS)/CD8-FLI-ChIP-Seq (GSE20898)/Homer   | 1e-120  | -2.770e+02   | 0.0000              | 12460.0                       | 65.53%                            | 14952.1                           | 57.23%                               | <a href="#">motif file (matrix)</a> | <a href="#">pdf</a> |
| 8    |  | ELF1(ETS)/Jurkat-ELF1-ChIP-Seq/Homer          | 1e-110  | -2.540e+02   | 0.0000              | 7972.0                        | 41.92%                            | 8912.4                            | 34.11%                               | <a href="#">motif file (matrix)</a> | <a href="#">pdf</a> |
| 9    |  | YY1(Zf)/Promoter/Homer                        | 1e-105  | -2.434e+02   | 0.0000              | 1847.0                        | 9.71%                             | 1487.0                            | 5.69%                                | <a href="#">motif file (matrix)</a> | <a href="#">pdf</a> |
| 10   |  | BMYB(HTH)/Hela-BMYB-ChIPSeq (GSE27030)/Homer  | 1e-103  | -2.378e+02   | 0.0000              | 12992.0                       | 68.33%                            | 15876.7                           | 60.77%                               | <a href="#">motif file (matrix)</a> | <a href="#">pdf</a> |
| 11   |                                                                                     | Sp1(Zf)/Promoter/Homer                        | 1e-95   | -2.208e+02   | 0.0000              | 7766.0                        | 40.84%                            | 8777.9                            | 33.60%                               | <a href="#">motif file (matrix)</a> | <a href="#">pdf</a> |

|    |  |                                                   |       |            |        |         |        |         |        |                                     |                     |  |
|----|--|---------------------------------------------------|-------|------------|--------|---------|--------|---------|--------|-------------------------------------|---------------------|--|
|    |  |                                                   |       |            |        |         |        |         |        |                                     |                     |  |
| 12 |  | NFAT(RHD)/Jurkat-NFATC1-ChIP-Seq/Homer            | 1e-87 | -2.009e+02 | 0.0000 | 8824.0  | 46.41% | 10270.0 | 39.31% | <a href="#">motif file (matrix)</a> | <a href="#">pdf</a> |  |
| 13 |  | p53(p53)/mES-cMyc-ChIP-Seq/Homer                  | 1e-84 | -1.939e+02 | 0.0000 | 646.0   | 3.40%  | 372.9   | 1.43%  | <a href="#">motif file (matrix)</a> | <a href="#">pdf</a> |  |
| 14 |  | ETS(ETS)/Promoter/Homer                           | 1e-78 | -1.801e+02 | 0.0000 | 5114.0  | 26.89% | 5529.7  | 21.17% | <a href="#">motif file (matrix)</a> | <a href="#">pdf</a> |  |
| 15 |  | FOXP1(Forkhead)/H9-FOXP1-ChIP-Seq(GSE31006)/Homer | 1e-70 | -1.618e+02 | 0.0000 | 4728.0  | 24.86% | 5117.4  | 19.59% | <a href="#">motif file (matrix)</a> | <a href="#">pdf</a> |  |
| 16 |  | MYB(HTH)/ERMYB-Myb-ChIPSeq(GSE22095)/Homer        | 1e-65 | -1.503e+02 | 0.0000 | 13988.0 | 73.56% | 17729.9 | 67.86% | <a href="#">motif file (matrix)</a> | <a href="#">pdf</a> |  |
| 17 |  | GABPA(ETS)/Jurkat-GABPa-ChIP-Seq/Homer            | 1e-63 | -1.453e+02 | 0.0000 | 10078.0 | 53.00% | 12253.5 | 46.90% | <a href="#">motif file (matrix)</a> | <a href="#">pdf</a> |  |
| 18 |  | Foxa2(Forkhead)/Liver-Foxa2-ChIP-Seq/Homer        | 1e-54 | -1.264e+02 | 0.0000 | 7025.0  | 36.94% | 8252.5  | 31.59% | <a href="#">motif file (matrix)</a> | <a href="#">pdf</a> |  |
| 19 |  | E2F1(E2F)/Hela-E2F1-ChIP-Seq/Hoemr                | 1e-54 | -1.251e+02 | 0.0000 | 5950.0  | 31.29% | 6851.1  | 26.22% | <a href="#">motif file (matrix)</a> | <a href="#">pdf</a> |  |
| 20 |  | ETV1(ETS)/GIST48-ETV1-ChIP-Seq/Homer              | 1e-51 | -1.176e+02 | 0.0000 | 13072.0 | 68.75% | 16599.0 | 63.53% | <a href="#">motif file (matrix)</a> | <a href="#">pdf</a> |  |
| 21 |  | CHR/Cell-Cycle-Exp/Homer                          | 1e-50 | -1.168e+02 | 0.0000 | 6578.0  | 34.59% | 7717.2  | 29.54% | <a href="#">motif file (matrix)</a> | <a href="#">pdf</a> |  |
| 22 |  | PU.1-IRF/Bcell-PU.1-ChIP-Seq/Homer                | 1e-50 | -1.161e+02 | 0.0000 | 12451.0 | 65.48% | 15727.1 | 60.20% | <a href="#">motif file (matrix)</a> | <a href="#">pdf</a> |  |
| 23 |  | TATA-Box (TBP)/Promoter/Homer                     | 1e-49 | -1.131e+02 | 0.0000 | 11053.0 | 58.13% | 13790.5 | 52.78% | <a href="#">motif file (matrix)</a> | <a href="#">pdf</a> |  |
| 24 |  | NFkB-p65(RHD)/GM12787-p65-ChIP-Seq/Homer          | 1e-46 | -1.073e+02 | 0.0000 | 6861.0  | 36.08% | 8145.8  | 31.18% | <a href="#">motif file (matrix)</a> | <a href="#">pdf</a> |  |

|    |  |                                                      |       |            |        |         |        |         |        |                                     |                     |  |
|----|--|------------------------------------------------------|-------|------------|--------|---------|--------|---------|--------|-------------------------------------|---------------------|--|
|    |  |                                                      |       |            |        |         |        |         |        |                                     |                     |  |
| 25 |  | Tbox:Smad/ESCd5-Smad2_3-ChIP-Seq (GSE29422)/Homer    | 1e-45 | -1.039e+02 | 0.0000 | 2485.0  | 13.07% | 2578.1  | 9.87%  | <a href="#">motif file (matrix)</a> | <a href="#">pdf</a> |  |
| 26 |  | VDR(NR/DR3)/GM10855-VDR+vitD-ChIP-Seq/Homer          | 1e-41 | -9.614e+01 | 0.0000 | 3064.0  | 16.11% | 3320.1  | 12.71% | <a href="#">motif file (matrix)</a> | <a href="#">pdf</a> |  |
| 27 |  | Egr2/Thymocytes-Egr2-ChIP-Seq(GSE34254)/Homer        | 1e-36 | -8.325e+01 | 0.0000 | 4262.0  | 22.41% | 4899.5  | 18.75% | <a href="#">motif file (matrix)</a> | <a href="#">pdf</a> |  |
| 28 |  | STAT6/Macrophage-Stat6-ChIP-Seq/Homer                | 1e-34 | -8.028e+01 | 0.0000 | 5316.0  | 27.96% | 6282.3  | 24.05% | <a href="#">motif file (matrix)</a> | <a href="#">pdf</a> |  |
| 29 |  | ETS1(ETS)/Jurkat-ETS1-ChIP-Seq/Homer                 | 1e-33 | -7.826e+01 | 0.0000 | 10676.0 | 56.15% | 13511.5 | 51.72% | <a href="#">motif file (matrix)</a> | <a href="#">pdf</a> |  |
| 30 |  | EBF1(EBF)/Near-E2A-ChIP-Seq/Homer                    | 1e-33 | -7.802e+01 | 0.0000 | 12284.0 | 64.60% | 15752.6 | 60.29% | <a href="#">motif file (matrix)</a> | <a href="#">pdf</a> |  |
| 31 |  | FOXA1(Forkhead)/LNCAP-FOXA1-ChIP-Seq/Homer           | 1e-31 | -7.272e+01 | 0.0000 | 9676.0  | 50.89% | 12179.9 | 46.62% | <a href="#">motif file (matrix)</a> | <a href="#">pdf</a> |  |
| 32 |  | Stat3(Stat)/mES-Stat3-ChIP-Seq/Homer                 | 1e-31 | -7.260e+01 | 0.0000 | 5959.0  | 31.34% | 7178.8  | 27.48% | <a href="#">motif file (matrix)</a> | <a href="#">pdf</a> |  |
| 33 |  | GATA3(Zf)/iTreg-Gata3-ChIP-Seq(GSE20898)/Homer       | 1e-30 | -7.004e+01 | 0.0000 | 11025.0 | 57.98% | 14059.9 | 53.82% | <a href="#">motif file (matrix)</a> | <a href="#">pdf</a> |  |
| 34 |  | STAT1(Stat)/HelaS3-STAT1-ChIP-Seq/Homer              | 1e-30 | -6.934e+01 | 0.0000 | 3197.0  | 16.81% | 3619.9  | 13.86% | <a href="#">motif file (matrix)</a> | <a href="#">pdf</a> |  |
| 35 |  | ERG(ETS)/VCaP-ERG-ChIP-Seq/Homer                     | 1e-30 | -6.912e+01 | 0.0000 | 13665.0 | 71.86% | 17772.1 | 68.02% | <a href="#">motif file (matrix)</a> | <a href="#">pdf</a> |  |
| 36 |  | EWS:FLI1-fusion(ETS)/SK_N_MC-EWS:FLI1-ChIP-Seq/Homer | 1e-28 | -6.485e+01 | 0.0000 | 6529.0  | 34.34% | 7991.2  | 30.59% | <a href="#">motif file (matrix)</a> | <a href="#">pdf</a> |  |
| 37 |  | Gata4(Zf)/Heart-Gata4-ChIP-Seq(GSE35151)/Homer       | 1e-28 | -6.453e+01 | 0.0000 | 8161.0  | 42.92% | 10184.1 | 38.98% | <a href="#">motif file (matrix)</a> | <a href="#">pdf</a> |  |

|    |                                                                                      |                                                    |       |            |        |         |        |         |        |                                     |                     |  |
|----|--------------------------------------------------------------------------------------|----------------------------------------------------|-------|------------|--------|---------|--------|---------|--------|-------------------------------------|---------------------|--|
|    |     |                                                    |       |            |        |         |        |         |        |                                     |                     |  |
| 38 |     | Lhx3(Homeobox)/Forebrain-p300-ChIP-Seq/Homer       | 1e-26 | -6.212e+01 | 0.0000 | 8398.0  | 44.17% | 10525.7 | 40.29% | <a href="#">motif file (matrix)</a> | <a href="#">pdf</a> |  |
| 39 |     | STAT6(Stat)/CD4-Stat6-ChIP-Seq/Homer               | 1e-26 | -6.014e+01 | 0.0000 | 5241.0  | 27.56% | 6322.4  | 24.20% | <a href="#">motif file (matrix)</a> | <a href="#">pdf</a> |  |
| 40 |     | STAT4(Stat)/CD4-Stat4-ChIP-Seq/Homer               | 1e-25 | -5.761e+01 | 0.0000 | 8619.0  | 45.33% | 10864.8 | 41.59% | <a href="#">motif file (matrix)</a> | <a href="#">pdf</a> |  |
| 41 |     | FOXA1(Forkhead)/MCF7-FOXA1-ChIP-Seq/Homer          | 1e-24 | -5.607e+01 | 0.0000 | 8578.0  | 45.11% | 10822.6 | 41.42% | <a href="#">motif file (matrix)</a> | <a href="#">pdf</a> |  |
| 42 |     | E2F7(E2F)/Hela-E2F7-ChIP-Seq(GSE32673)/Homer       | 1e-23 | -5.506e+01 | 0.0000 | 3010.0  | 15.83% | 3464.8  | 13.26% | <a href="#">motif file (matrix)</a> | <a href="#">pdf</a> |  |
| 43 |     | EGR(Zf)/K562-EGR1-ChIP-Seq/Homer                   | 1e-23 | -5.485e+01 | 0.0000 | 4543.0  | 23.89% | 5446.1  | 20.85% | <a href="#">motif file (matrix)</a> | <a href="#">pdf</a> |  |
| 44 |     | STAT5(Stat)/mCD4+-Stat5a b-ChIP-Seq/Homer          | 1e-23 | -5.406e+01 | 0.0000 | 3472.0  | 18.26% | 4062.6  | 15.55% | <a href="#">motif file (matrix)</a> | <a href="#">pdf</a> |  |
| 45 |     | SCL/HPC7-Scl-ChIP-Seq/Homer                        | 1e-22 | -5.205e+01 | 0.0000 | 18524.0 | 97.42% | 25109.9 | 96.11% | <a href="#">motif file (matrix)</a> | <a href="#">pdf</a> |  |
| 46 |  | BORIS(Zf)/K562-CTCF-ChIP-Seq/Homer                 | 1e-21 | -4.916e+01 | 0.0000 | 4027.0  | 21.18% | 4815.5  | 18.43% | <a href="#">motif file (matrix)</a> | <a href="#">pdf</a> |  |
| 47 |   | PRDM1/BMI1(Zf)/Hela-PRDM1-ChIP-Seq(GSE31477)/Homer | 1e-21 | -4.840e+01 | 0.0000 | 5910.0  | 31.08% | 7302.6  | 27.95% | <a href="#">motif file (matrix)</a> | <a href="#">pdf</a> |  |
| 48 |   | Smad2(MAD)/ES-SMAD2-ChIP-Seq(GSE29422)/Homer       | 1e-20 | -4.815e+01 | 0.0000 | 13521.0 | 71.11% | 17745.1 | 67.92% | <a href="#">motif file (matrix)</a> | <a href="#">pdf</a> |  |
| 49 |   | CEBP:AP1/ThioMac-CEBPb-ChIP-Seq/Homer              | 1e-20 | -4.706e+01 | 0.0000 | 6469.0  | 34.02% | 8060.9  | 30.85% | <a href="#">motif file (matrix)</a> | <a href="#">pdf</a> |  |
| 50 |                                                                                      | AR-halfsite(NR)/LNCaP-AR-ChIP-Seq/Homer            | 1e-20 | -4.682e+01 | 0.0000 | 17970.0 | 94.50% | 24249.1 | 92.82% | <a href="#">motif file (matrix)</a> | <a href="#">pdf</a> |  |

|    |                                                                                     |                                                           |       |            |        |         |        |         |        |                                     |                     |  |
|----|-------------------------------------------------------------------------------------|-----------------------------------------------------------|-------|------------|--------|---------|--------|---------|--------|-------------------------------------|---------------------|--|
|    |    |                                                           |       |            |        |         |        |         |        |                                     |                     |  |
| 51 |    | Znf263(Zf)/K562-Znf263-ChIP-Seq/Homer                     | 1e-20 | -4.665e+01 | 0.0000 | 15882.0 | 83.52% | 21138.6 | 80.91% | <a href="#">motif file (matrix)</a> | <a href="#">pdf</a> |  |
| 52 |    | Smad4(MAD)/ESC-SMAD4-ChIP-Seq(GSE29422)/Homer             | 1e-20 | -4.615e+01 | 0.0000 | 13758.0 | 72.35% | 18099.8 | 69.28% | <a href="#">motif file (matrix)</a> | <a href="#">pdf</a> |  |
| 53 |   | CTCF(Zf)/CD4+-CTCF-ChIP-Seq/Homer                         | 1e-19 | -4.526e+01 | 0.0000 | 1902.0  | 10.00% | 2122.6  | 8.12%  | <a href="#">motif file (matrix)</a> | <a href="#">pdf</a> |  |
| 54 |    | Bcl6(Zf)/Liver-Bcl6-ChIP-Seq(GSE31578)/Homer              | 1e-19 | -4.435e+01 | 0.0000 | 11630.0 | 61.16% | 15132.2 | 57.92% | <a href="#">motif file (matrix)</a> | <a href="#">pdf</a> |  |
| 55 |    | SPDEF(ETS)/VCaP-SPDEF-ChIP-Seq/Homer                      | 1e-18 | -4.333e+01 | 0.0000 | 9922.0  | 52.18% | 12782.3 | 48.93% | <a href="#">motif file (matrix)</a> | <a href="#">pdf</a> |  |
| 56 |    | PU.1(ETS)/ThioMac-PU.1-ChIP-Seq/Homer                     | 1e-18 | -4.296e+01 | 0.0000 | 5264.0  | 27.68% | 6492.3  | 24.85% | <a href="#">motif file (matrix)</a> | <a href="#">pdf</a> |  |
| 57 |    | Unknown/Homeobox/Limbp300-ChIP-Seq/Homer                  | 1e-18 | -4.276e+01 | 0.0000 | 6217.0  | 32.70% | 7763.7  | 29.72% | <a href="#">motif file (matrix)</a> | <a href="#">pdf</a> |  |
| 58 |    | OCT4-SOX2-TCF-NANOG((POU/Homeobox/HMG)/mES-ChIP-Seq/Homer | 1e-18 | -4.257e+01 | 0.0000 | 1883.0  | 9.90%  | 2113.9  | 8.09%  | <a href="#">motif file (matrix)</a> | <a href="#">pdf</a> |  |
| 59 |  | EWS:ERG-fusion(ETS)/CADO_ES1-EWS:ERG-ChIP-Seq/Homer       | 1e-17 | -4.143e+01 | 0.0000 | 6963.0  | 36.62% | 8777.4  | 33.60% | <a href="#">motif file (matrix)</a> | <a href="#">pdf</a> |  |
| 60 |  | Stat3+i123(Stat)/CD4-Stat3-ChIP-Seq/Homer                 | 1e-17 | -3.918e+01 | 0.0000 | 7196.0  | 37.84% | 9114.9  | 34.89% | <a href="#">motif file (matrix)</a> | <a href="#">pdf</a> |  |
| 61 |  | Sox3(HMG)/NPC-Sox3-ChIP-Seq(GSE33059)/Homer               | 1e-16 | -3.814e+01 | 0.0000 | 12120.0 | 63.74% | 15880.9 | 60.79% | <a href="#">motif file (matrix)</a> | <a href="#">pdf</a> |  |
| 62 |  | NRF1(NRF)/MCF7-NRF1-ChIP-Seq/Homer                        | 1e-16 | -3.757e+01 | 0.0000 | 3043.0  | 16.00% | 3625.9  | 13.88% | <a href="#">motif file (matrix)</a> | <a href="#">pdf</a> |  |
| 63 |                                                                                     | E2F(E2F)/Cell-Cycle-Exp/Homer                             | 1e-16 | -3.728e+01 | 0.0000 | 1252.0  | 6.58%  | 1358.8  | 5.20%  | <a href="#">motif file (matrix)</a> | <a href="#">pdf</a> |  |

|    |                                                                                     |                                                |       |            |        |         |        |         |        |                                     |                     |  |
|----|-------------------------------------------------------------------------------------|------------------------------------------------|-------|------------|--------|---------|--------|---------|--------|-------------------------------------|---------------------|--|
|    |    |                                                |       |            |        |         |        |         |        |                                     |                     |  |
| 64 |    | Gata1(Zf)/K562-GATA1-ChIP-Seq/Homer            | 1e-14 | -3.454e+01 | 0.0000 | 5037.0  | 26.49% | 6270.7  | 24.00% | <a href="#">motif file (matrix)</a> | <a href="#">pdf</a> |  |
| 65 |    | Nanog(Homeobox)/mES-Nanog-ChIP-Seq/Homer       | 1e-13 | -3.195e+01 | 0.0000 | 18066.0 | 95.01% | 24482.6 | 93.71% | <a href="#">motif file (matrix)</a> | <a href="#">pdf</a> |  |
| 66 |    | Foxo1(Forkhead)/RAW-Foxo1-ChIP-Seq/Homer       | 1e-13 | -3.128e+01 | 0.0000 | 13639.0 | 71.73% | 18085.2 | 69.22% | <a href="#">motif file (matrix)</a> | <a href="#">pdf</a> |  |
| 67 |    | Eomes(T-box)/H9-Eomes-ChIP-Seq/Homer           | 1e-13 | -3.106e+01 | 0.0000 | 17172.0 | 90.31% | 23151.1 | 88.61% | <a href="#">motif file (matrix)</a> | <a href="#">pdf</a> |  |
| 68 |    | GFY(?)/Promoter/Homer                          | 1e-12 | -2.908e+01 | 0.0000 | 1134.0  | 5.96%  | 1254.3  | 4.80%  | <a href="#">motif file (matrix)</a> | <a href="#">pdf</a> |  |
| 69 |    | Nur77(NR)/K562-NR4A1-ChIP-Seq(GSE31363)/Homer  | 1e-12 | -2.904e+01 | 0.0000 | 1722.0  | 9.06%  | 1992.5  | 7.63%  | <a href="#">motif file (matrix)</a> | <a href="#">pdf</a> |  |
| 70 |    | Gata2(Zf)/K562-GATA2-ChIP-Seq/Homer            | 1e-11 | -2.602e+01 | 0.0000 | 5560.0  | 29.24% | 7061.1  | 27.03% | <a href="#">motif file (matrix)</a> | <a href="#">pdf</a> |  |
| 71 |    | Pdx1(Homeobox)/Islet-Pdx1-ChIP-Seq/Homer       | 1e-11 | -2.570e+01 | 0.0000 | 7085.0  | 37.26% | 9120.4  | 34.91% | <a href="#">motif file (matrix)</a> | <a href="#">pdf</a> |  |
| 72 |  | HIF2a(HLH)/O785-HIF2a-ChIP-Seq(GSE34871)/Homer | 1e-10 | -2.523e+01 | 0.0000 | 4833.0  | 25.42% | 6098.5  | 23.34% | <a href="#">motif file (matrix)</a> | <a href="#">pdf</a> |  |
| 73 |  | HOXA9/HSC-Hoxa9-ChIP-Seq(GSE33509)/Homer       | 1e-10 | -2.504e+01 | 0.0000 | 5540.0  | 29.13% | 7046.4  | 26.97% | <a href="#">motif file (matrix)</a> | <a href="#">pdf</a> |  |
| 74 |  | Oct4(POU)/Homeobox)/mES-Oct4-ChIP-Seq/Homer    | 1e-10 | -2.353e+01 | 0.0000 | 4216.0  | 22.17% | 5296.3  | 20.27% | <a href="#">motif file (matrix)</a> | <a href="#">pdf</a> |  |
| 75 |  | NFkB-p65-Rel(RHD)/LPS-exp/Homer                | 1e-10 | -2.337e+01 | 0.0000 | 783.0   | 4.12%  | 851.7   | 3.26%  | <a href="#">motif file (matrix)</a> | <a href="#">pdf</a> |  |
| 76 |                                                                                     | Hnf1(Homeobox)/Liver-Foxa2-Chip-Seq/Homer      | 1e-9  | -2.281e+01 | 0.0000 | 1523.0  | 8.01%  | 1782.7  | 6.82%  | <a href="#">motif file (matrix)</a> | <a href="#">pdf</a> |  |

|    |                                                                                     |                                                 |      |            |        |        |        |        |        |                                     |                     |  |
|----|-------------------------------------------------------------------------------------|-------------------------------------------------|------|------------|--------|--------|--------|--------|--------|-------------------------------------|---------------------|--|
|    |    |                                                 |      |            |        |        |        |        |        |                                     |                     |  |
| 77 |    | T1HSRE(IRF)/Iffb-Exp/Homer                      | 1e-9 | -2.236e+01 | 0.0000 | 157.0  | 0.83%  | 125.6  | 0.48%  | <a href="#">motif file (matrix)</a> | <a href="#">pdf</a> |  |
| 78 |    | RFX(HTH)/K562-RFX3-ChIP-Seq/Homer               | 1e-9 | -2.191e+01 | 0.0000 | 1125.0 | 5.92%  | 1284.6 | 4.92%  | <a href="#">motif file (matrix)</a> | <a href="#">pdf</a> |  |
| 79 |    | Tcf3(HMG)/mES-Tcf3-ChIP-Seq/Homer               | 1e-9 | -2.135e+01 | 0.0000 | 2241.0 | 11.79% | 2719.2 | 10.41% | <a href="#">motif file (matrix)</a> | <a href="#">pdf</a> |  |
| 80 |    | PRDM14(Zf)/H1-PRDM14-ChIP-Seq/Homer             | 1e-8 | -2.007e+01 | 0.0000 | 3237.0 | 17.02% | 4039.0 | 15.46% | <a href="#">motif file (matrix)</a> | <a href="#">pdf</a> |  |
| 81 |    | Tcf4(HMG)/Hct116-Tcf4-ChIP-Seq/Homer            | 1e-8 | -1.973e+01 | 0.0000 | 3913.0 | 20.58% | 4938.7 | 18.90% | <a href="#">motif file (matrix)</a> | <a href="#">pdf</a> |  |
| 82 |    | Cdx2(Homeobox)/mES-Cdx2-ChIP-Seq/Homer          | 1e-8 | -1.946e+01 | 0.0000 | 6157.0 | 32.38% | 7951.6 | 30.44% | <a href="#">motif file (matrix)</a> | <a href="#">pdf</a> |  |
| 83 |    | Hoxc9/Ainv15-Hoxc9-ChIP-Seq/Homer               | 1e-7 | -1.837e+01 | 0.0000 | 4448.0 | 23.39% | 5669.1 | 21.70% | <a href="#">motif file (matrix)</a> | <a href="#">pdf</a> |  |
| 84 |    | NFkB-p50,p52(RHD)/p50-ChIP-Chip/Homer           | 1e-7 | -1.702e+01 | 0.0000 | 2335.0 | 12.28% | 2884.5 | 11.04% | <a href="#">motif file (matrix)</a> | <a href="#">pdf</a> |  |
| 85 |   | IRF4(IRF)/GM12878-IRF4-ChIP-Seq/Homer           | 1e-7 | -1.653e+01 | 0.0000 | 4299.0 | 22.61% | 5495.8 | 21.04% | <a href="#">motif file (matrix)</a> | <a href="#">pdf</a> |  |
| 86 |  | NRF1/Promoter/Homer                             | 1e-6 | -1.610e+01 | 0.0000 | 2960.0 | 15.57% | 3718.6 | 14.23% | <a href="#">motif file (matrix)</a> | <a href="#">pdf</a> |  |
| 87 |  | Ets1-distal(ETS)/CD4+-PolII-ChIP-Seq/Homer      | 1e-6 | -1.567e+01 | 0.0000 | 2823.0 | 14.85% | 3542.9 | 13.56% | <a href="#">motif file (matrix)</a> | <a href="#">pdf</a> |  |
| 88 |  | TCFL2(HMG)/K562-TCF7L2-ChIP-Seq(GSE29196)/Homer | 1e-6 | -1.534e+01 | 0.0000 | 709.0  | 3.73%  | 803.6  | 3.08%  | <a href="#">motif file (matrix)</a> | <a href="#">pdf</a> |  |
| 89 |                                                                                     | HNF6(Homeobox)/Liver-Hnf6-ChIP-Seq(ERP000394)   | 1e-6 | -1.528e+01 | 0.0000 | 4744.0 | 24.95% | 6110.4 | 23.39% | <a href="#">motif file (matrix)</a> | <a href="#">pdf</a> |  |



|     |                                                                                     |                                                     |      |            |        |         |        |         |        |                                     |                     |  |  |
|-----|-------------------------------------------------------------------------------------|-----------------------------------------------------|------|------------|--------|---------|--------|---------|--------|-------------------------------------|---------------------|--|--|
|     |    |                                                     |      |            |        |         |        |         |        |                                     |                     |  |  |
| 90  |    | X-box(HTH)/NPC-H3K4me1-ChIP-Seq/Homer               | 1e-6 | -1.479e+01 | 0.0000 | 1118.0  | 5.88%  | 1325.5  | 5.07%  | <a href="#">motif file (matrix)</a> | <a href="#">pdf</a> |  |  |
| 91  |    | ISRE(IRF)/ThioMac-LPS-exp/HOMER                     | 1e-6 | -1.431e+01 | 0.0000 | 731.0   | 3.84%  | 837.3   | 3.20%  | <a href="#">motif file (matrix)</a> | <a href="#">pdf</a> |  |  |
| 92  |    | Foxh1(Forkhead)/hESC-FOXH1-ChIP-Seq(GSE29422)/Homer | 1e-5 | -1.270e+01 | 0.0000 | 5612.0  | 29.51% | 7323.1  | 28.03% | <a href="#">motif file (matrix)</a> | <a href="#">pdf</a> |  |  |
| 93  |    | Sox6(HMG)/Myotubes-Sox6-ChIP-Seq(GSE32627)/Homer    | 1e-5 | -1.265e+01 | 0.0000 | 11242.0 | 59.12% | 15023.6 | 57.50% | <a href="#">motif file (matrix)</a> | <a href="#">pdf</a> |  |  |
| 94  |    | PR(NR)/T47D-PR-ChIP-Seq(GSE31130)/Homer             | 1e-4 | -1.111e+01 | 0.0000 | 14084.0 | 74.07% | 18999.4 | 72.72% | <a href="#">motif file (matrix)</a> | <a href="#">pdf</a> |  |  |
| 95  |    | CRX(Homeobox)/Retina-Crx-ChIP-Seq/Homer             | 1e-4 | -1.031e+01 | 0.0001 | 15702.0 | 82.58% | 21281.9 | 81.46% | <a href="#">motif file (matrix)</a> | <a href="#">pdf</a> |  |  |
| 96  |    | Oct2(POU/Homeobox)/Bcell-Oct2-ChIP-Seq/Homer        | 1e-4 | -9.832e+00 | 0.0001 | 2820.0  | 14.83% | 3618.4  | 13.85% | <a href="#">motif file (matrix)</a> | <a href="#">pdf</a> |  |  |
| 97  |    | Rfx1(HTH)/NPC-Rfx1-ChIP-Seq/Homer                   | 1e-4 | -9.664e+00 | 0.0001 | 2215.0  | 11.65% | 2815.6  | 10.78% | <a href="#">motif file (matrix)</a> | <a href="#">pdf</a> |  |  |
| 98  |  | AP-2alpha(AP2)/Hela-AP2alpha-ChIP-Seq/Homer         | 1e-4 | -9.365e+00 | 0.0002 | 11227.0 | 59.04% | 15073.4 | 57.69% | <a href="#">motif file (matrix)</a> | <a href="#">pdf</a> |  |  |
| 99  |  | Sox2(HMG)/mES-Sox2-ChIP-Seq/Homer                   | 1e-3 | -8.476e+00 | 0.0005 | 7253.0  | 38.14% | 9641.3  | 36.90% | <a href="#">motif file (matrix)</a> | <a href="#">pdf</a> |  |  |
| 100 |  | JunD(bZIP)/K562-JunD-ChIP-Seq/Homer                 | 1e-3 | -7.963e+00 | 0.0007 | 778.0   | 4.09%  | 946.9   | 3.62%  | <a href="#">motif file (matrix)</a> | <a href="#">pdf</a> |  |  |
| 101 |  | RXR(NR/DR1)/3T3L1-RXR-ChIP-Seq/Homer                | 1e-3 | -7.907e+00 | 0.0008 | 11122.0 | 58.49% | 14964.3 | 57.28% | <a href="#">motif file (matrix)</a> | <a href="#">pdf</a> |  |  |
| 102 |                                                                                     | MyoD(HLH)/Myotube-MyoD-ChIP-Seq/Homer               | 1e-2 | -6.326e+00 | 0.0038 | 8060.0  | 42.39% | 10801.6 | 41.34% | <a href="#">motif file (matrix)</a> | <a href="#">pdf</a> |  |  |

|     |                                                                                   |                                                         |      |            |        |        |        |        |        |                                     |                     |  |
|-----|-----------------------------------------------------------------------------------|---------------------------------------------------------|------|------------|--------|--------|--------|--------|--------|-------------------------------------|---------------------|--|
|     |  |                                                         |      |            |        |        |        |        |        |                                     |                     |  |
| 103 |  | TR4(NR/DR1)/Hela-TR4-ChIP-Seq/Homer                     | 1e-2 | -6.129e+00 | 0.0045 | 1366.0 | 7.18%  | 1740.8 | 6.66%  | <a href="#">motif file (matrix)</a> | <a href="#">pdf</a> |  |
| 104 |  | Hoxb4/ES-Hoxb4-ChIP-Seq (GSE34014)/Homer                | 1e-2 | -5.559e+00 | 0.0080 | 1563.0 | 8.22%  | 2011.3 | 7.70%  | <a href="#">motif file (matrix)</a> | <a href="#">pdf</a> |  |
| 105 |  | Six1(Homeobox)/Myoblast-Six1-ChIP-Chip (GSE20150)/Homer | 1e-2 | -5.464e+00 | 0.0087 | 2305.0 | 12.12% | 3006.4 | 11.51% | <a href="#">motif file (matrix)</a> | <a href="#">pdf</a> |  |

## **Results homer motif enrichments (known motifs)**

NCCIT h3k27ac

## Homer Known Motif Enrichment Results

[Homer de novo Motif Results](#)

[Gene Ontology Enrichment Results](#)

[Known Motif Enrichment Results \(txt file\)](#)

Total Target Sequences = 23765, Total Background Sequences = 24649

| Rank | Motif                                                                               | Name                                                       | P-value | log P-pvalue | q-value (Benjamini) | # Target Sequences with Motif | % of Targets Sequences with Motif | # Background Sequences with Motif | % of Background Sequences with Motif | Motif File                          | PDF                 |
|------|-------------------------------------------------------------------------------------|------------------------------------------------------------|---------|--------------|---------------------|-------------------------------|-----------------------------------|-----------------------------------|--------------------------------------|-------------------------------------|---------------------|
| 1    |    | OCT4-SOX2-TCF-NANOG ((POU/Homeobox/HMG)/mES-ChIP-Seq/Homer | 1e-339  | -7.813e+02   | 0.0000              | 5454.0                        | 22.95%                            | 3325.1                            | 13.49%                               | <a href="#">motif file (matrix)</a> | <a href="#">pdf</a> |
| 2    |    | Elk4(ETS)/Hela-Elk4-ChIP-Seq (GSE31477)/Homer              | 1e-244  | -5.634e+02   | 0.0000              | 8137.0                        | 34.24%                            | 6049.5                            | 24.55%                               | <a href="#">motif file (matrix)</a> | <a href="#">pdf</a> |
| 3    |    | Elk1(ETS)/Hela-Elk1-ChIP-Seq (GSE31477)/Homer              | 1e-228  | -5.263e+02   | 0.0000              | 8088.0                        | 34.04%                            | 6078.9                            | 24.67%                               | <a href="#">motif file (matrix)</a> | <a href="#">pdf</a> |
| 4    |    | Fli1(ETS)/CD8-FLI-ChIP-Seq (GSE20898)/Homer                | 1e-227  | -5.238e+02   | 0.0000              | 14162.0                       | 59.60%                            | 12115.4                           | 49.17%                               | <a href="#">motif file (matrix)</a> | <a href="#">pdf</a> |
| 5    |    | GABPA(ETS)/Jurkat-GABPa-ChIP-Seq/Homer                     | 1e-177  | -4.097e+02   | 0.0000              | 12045.0                       | 50.69%                            | 10229.3                           | 41.51%                               | <a href="#">motif file (matrix)</a> | <a href="#">pdf</a> |
| 6    |    | Sox3(HMG)/NPC-Sox3-ChIP-Seq(GSE33059)/Homer                | 1e-170  | -3.934e+02   | 0.0000              | 18849.0                       | 79.32%                            | 17593.4                           | 71.40%                               | <a href="#">motif file (matrix)</a> | <a href="#">pdf</a> |
| 7    |  | ERG(ETS)/VCaP-ERG-ChIP-Seq/Homer                           | 1e-166  | -3.836e+02   | 0.0000              | 17766.0                       | 74.76%                            | 16393.5                           | 66.53%                               | <a href="#">motif file (matrix)</a> | <a href="#">pdf</a> |
| 8    |  | Sox2(HMG)/mES-Sox2-ChIP-Seq/Homer                          | 1e-165  | -3.801e+02   | 0.0000              | 12787.0                       | 53.81%                            | 11071.1                           | 44.93%                               | <a href="#">motif file (matrix)</a> | <a href="#">pdf</a> |
| 9    |  | Maz(Zf)/HepG2-Maz-ChIP-Seq (GSE31477)/Homer                | 1e-164  | -3.778e+02   | 0.0000              | 13925.0                       | 58.60%                            | 12260.0                           | 49.76%                               | <a href="#">motif file (matrix)</a> | <a href="#">pdf</a> |
| 10   |  | ETV1(ETS)/GIST48-ETV1-ChIP-Seq/Homer                       | 1e-163  | -3.774e+02   | 0.0000              | 15972.0                       | 67.21%                            | 14438.5                           | 58.60%                               | <a href="#">motif file (matrix)</a> | <a href="#">pdf</a> |
| 11   |                                                                                     | EWS-FLI1-fusion (ETS)/SK_N_MC-EWS:FLI1-ChIP-Seq/Homer      | 1e-162  | -3.749e+02   | 0.0000              | 8751.0                        | 36.83%                            | 7057.5                            | 28.64%                               | <a href="#">motif file (matrix)</a> | <a href="#">pdf</a> |

|    |                                                                                     |                                                      |        |            |        |         |        |         |        |                                     |                     |  |
|----|-------------------------------------------------------------------------------------|------------------------------------------------------|--------|------------|--------|---------|--------|---------|--------|-------------------------------------|---------------------|--|
|    |    |                                                      |        |            |        |         |        |         |        |                                     |                     |  |
| 12 |    | ETS(ETS)/Promoter/Homer                              | 1e-158 | -3.658e+02 | 0.0000 | 5145.0  | 21.65% | 3715.5  | 15.08% | <a href="#">motif file (matrix)</a> | <a href="#">pdf</a> |  |
| 13 |    | ELF1(ETS)/Jurkat-ELF1-ChIP-Seq/Homer                 | 1e-154 | -3.561e+02 | 0.0000 | 7405.0  | 31.16% | 5818.7  | 23.61% | <a href="#">motif file (matrix)</a> | <a href="#">pdf</a> |  |
| 14 |    | BMYB(HTH)/Hela-BMYB-ChIPSeq(GSE27030)/Homer          | 1e-142 | -3.274e+02 | 0.0000 | 16931.0 | 71.25% | 15633.9 | 63.45% | <a href="#">motif file (matrix)</a> | <a href="#">pdf</a> |  |
| 15 |    | ETS1(ETS)/Jurkat-ETS1-ChIP-Seq/Homer                 | 1e-141 | -3.252e+02 | 0.0000 | 13458.0 | 56.63% | 11931.5 | 48.42% | <a href="#">motif file (matrix)</a> | <a href="#">pdf</a> |  |
| 16 |    | MYB(HTH)/ERMYB-Myb-ChIPSeq(GSE22095)/Homer           | 1e-127 | -2.936e+02 | 0.0000 | 17972.0 | 75.63% | 16891.0 | 68.55% | <a href="#">motif file (matrix)</a> | <a href="#">pdf</a> |  |
| 17 |    | Oct4(POU)/Homeobox/mES-Oct4-ChIP-Seq/Homer           | 1e-122 | -2.831e+02 | 0.0000 | 8890.0  | 37.41% | 7449.1  | 30.23% | <a href="#">motif file (matrix)</a> | <a href="#">pdf</a> |  |
| 18 |    | EWS:ERG-fusion(ETS)/CADO_ES1-EWS:ERG-ChIP-Seq/Homer  | 1e-106 | -2.448e+02 | 0.0000 | 11190.0 | 47.09% | 9870.3  | 40.06% | <a href="#">motif file (matrix)</a> | <a href="#">pdf</a> |  |
| 19 |    | EBF1(EBF)/Near-E2A-ChIP-Seq/Homer                    | 1e-105 | -2.419e+02 | 0.0000 | 12778.0 | 53.77% | 11507.0 | 46.70% | <a href="#">motif file (matrix)</a> | <a href="#">pdf</a> |  |
| 20 |  | Sox6(HMG)/Myotubes-Sox6-ChIP-Seq(GSE32627)/Homer     | 1e-103 | -2.391e+02 | 0.0000 | 17972.0 | 75.63% | 17070.4 | 69.28% | <a href="#">motif file (matrix)</a> | <a href="#">pdf</a> |  |
| 21 |  | SPDEF(ETS)/VCaP-SPDEF-ChIP-Seq/Homer                 | 1e-101 | -2.329e+02 | 0.0000 | 13125.0 | 55.23% | 11900.4 | 48.30% | <a href="#">motif file (matrix)</a> | <a href="#">pdf</a> |  |
| 22 |  | Stat3(Stat)/mES-Stat3-ChIP-Seq/Homer                 | 1e-93  | -2.161e+02 | 0.0000 | 7438.0  | 31.30% | 6246.3  | 25.35% | <a href="#">motif file (matrix)</a> | <a href="#">pdf</a> |  |
| 23 |  | Bach1(bZIP)/K562-Bach1-ChIP-Seq(GSE31477)/Homer      | 1e-90  | -2.074e+02 | 0.0000 | 1155.0  | 4.86%  | 627.6   | 2.55%  | <a href="#">motif file (matrix)</a> | <a href="#">pdf</a> |  |
| 24 |                                                                                     | Nrf2(bZIP)/Lymphoblast-Nrf2-ChIP-Seq(GSE37589)/Homer | 1e-87  | -2.014e+02 | 0.0000 | 1038.0  | 4.37%  | 547.3   | 2.22%  | <a href="#">motif file (matrix)</a> | <a href="#">pdf</a> |  |

|    |                                                                                     |                                                |       |            |        |         |        |         |        |                                     |                     |  |
|----|-------------------------------------------------------------------------------------|------------------------------------------------|-------|------------|--------|---------|--------|---------|--------|-------------------------------------|---------------------|--|
|    |    |                                                |       |            |        |         |        |         |        |                                     |                     |  |
| 25 |    | NF-E2(bZIP)/K562-NFE2-ChIP-Seq/Homer           | 1e-87 | -2.008e+02 | 0.0000 | 1177.0  | 4.95%  | 651.3   | 2.64%  | <a href="#">motif file (matrix)</a> | <a href="#">pdf</a> |  |
| 26 |    | E2F4(E2F)/K562-E2F4-ChIP-Seq(GSE31477)/Homer   | 1e-81 | -1.865e+02 | 0.0000 | 5586.0  | 23.51% | 4567.5  | 18.54% | <a href="#">motif file (matrix)</a> | <a href="#">pdf</a> |  |
| 27 |    | Ets1-distal(ETS)/CD4+-PolIII-ChIP-Seq/Homer    | 1e-76 | -1.768e+02 | 0.0000 | 4673.0  | 19.67% | 3739.1  | 15.17% | <a href="#">motif file (matrix)</a> | <a href="#">pdf</a> |  |
| 28 |    | YY1(Zf)/Promoter/Homer                         | 1e-76 | -1.761e+02 | 0.0000 | 1515.0  | 6.38%  | 948.9   | 3.85%  | <a href="#">motif file (matrix)</a> | <a href="#">pdf</a> |  |
| 29 |    | AP-2alpha(AP2)/Hela-AP2alpha-ChIP-Seq/Homer    | 1e-75 | -1.738e+02 | 0.0000 | 10701.0 | 45.03% | 9646.6  | 39.15% | <a href="#">motif file (matrix)</a> | <a href="#">pdf</a> |  |
| 30 |    | MafA(bZIP)/Islet-MafA-ChIP-Seq(GSE30298)/Homer | 1e-70 | -1.614e+02 | 0.0000 | 9799.0  | 41.24% | 8787.8  | 35.66% | <a href="#">motif file (matrix)</a> | <a href="#">pdf</a> |  |
| 31 |    | AP2gamma(AP2)/MCF7-TFAP2c-ChIP-Seq/Homer       | 1e-69 | -1.609e+02 | 0.0000 | 11178.0 | 47.04% | 10187.8 | 41.35% | <a href="#">motif file (matrix)</a> | <a href="#">pdf</a> |  |
| 32 |    | Stat3+il23(Stat)/CD4-Stat3-ChIP-Seq/Homer      | 1e-69 | -1.607e+02 | 0.0000 | 9833.0  | 41.38% | 8824.0  | 35.81% | <a href="#">motif file (matrix)</a> | <a href="#">pdf</a> |  |
| 33 |   | ZFX(Zf)/mES-Zfx-ChIP-Seq/Homer                 | 1e-69 | -1.601e+02 | 0.0000 | 14520.0 | 61.10% | 13658.7 | 55.43% | <a href="#">motif file (matrix)</a> | <a href="#">pdf</a> |  |
| 34 |  | Bcl6(Zf)/Liver-Bcl6-ChIP-Seq(GSE31578)/Homer   | 1e-66 | -1.542e+02 | 0.0000 | 16215.0 | 68.24% | 15488.7 | 62.86% | <a href="#">motif file (matrix)</a> | <a href="#">pdf</a> |  |
| 35 |  | STAT4(Stat)/CD4-Stat4-ChIP-Seq/Homer           | 1e-65 | -1.510e+02 | 0.0000 | 12929.0 | 54.41% | 12035.2 | 48.84% | <a href="#">motif file (matrix)</a> | <a href="#">pdf</a> |  |
| 36 |  | Jun-AP1(bZIP)/K562-cJun-ChIP-Seq/Homer         | 1e-64 | -1.483e+02 | 0.0000 | 3616.0  | 15.22% | 2844.1  | 11.54% | <a href="#">motif file (matrix)</a> | <a href="#">pdf</a> |  |
| 37 |                                                                                     | NRF1(NRF)/MCF7-NRF1-ChIP-Seq/Homer             | 1e-63 | -1.470e+02 | 0.0000 | 1485.0  | 6.25%  | 971.0   | 3.94%  | <a href="#">motif file (matrix)</a> | <a href="#">pdf</a> |  |

|    |                                                                                     |                                                |       |            |        |         |        |         |        |                                     |                     |  |  |
|----|-------------------------------------------------------------------------------------|------------------------------------------------|-------|------------|--------|---------|--------|---------|--------|-------------------------------------|---------------------|--|--|
|    |    |                                                |       |            |        |         |        |         |        |                                     |                     |  |  |
| 38 |    | HIF1b(HLH)/O785-HIF1b-ChIP-Seq(GSE34871)/Homer | 1e-61 | -1.413e+02 | 0.0000 | 8173.0  | 34.39% | 7249.0  | 29.42% | <a href="#">motif file (matrix)</a> | <a href="#">pdf</a> |  |  |
| 39 |    | CEBP:AP1/ThioMac-CEBPb-ChIP-Seq/Homer          | 1e-57 | -1.327e+02 | 0.0000 | 11131.0 | 46.84% | 10269.1 | 41.68% | <a href="#">motif file (matrix)</a> | <a href="#">pdf</a> |  |  |
| 40 |    | AP-1(bZIP)/ThioMac-PU.1-ChIP-Seq/Homer         | 1e-57 | -1.327e+02 | 0.0000 | 9866.0  | 41.52% | 8983.5  | 36.46% | <a href="#">motif file (matrix)</a> | <a href="#">pdf</a> |  |  |
| 41 |    | TATA-Box (TBP)/Promoter/Homer                  | 1e-56 | -1.308e+02 | 0.0000 | 16292.0 | 68.56% | 15680.0 | 63.64% | <a href="#">motif file (matrix)</a> | <a href="#">pdf</a> |  |  |
| 42 |    | PU.1-IRF/Bcell-PU.1-ChIP-Seq/Homer             | 1e-54 | -1.256e+02 | 0.0000 | 16603.0 | 69.87% | 16039.6 | 65.09% | <a href="#">motif file (matrix)</a> | <a href="#">pdf</a> |  |  |
| 43 |    | E2F6(E2F)/Hela-E2F6-ChIP-Seq(GSE31477)/Homer   | 1e-53 | -1.239e+02 | 0.0000 | 6823.0  | 28.71% | 5991.5  | 24.32% | <a href="#">motif file (matrix)</a> | <a href="#">pdf</a> |  |  |
| 44 |    | AARE(HLH)/mES-cMyc-ChIP-Seq/Homer              | 1e-49 | -1.133e+02 | 0.0000 | 2132.0  | 8.97%  | 1596.9  | 6.48%  | <a href="#">motif file (matrix)</a> | <a href="#">pdf</a> |  |  |
| 45 |    | CHR/Cell-Cycle-Exp/Homer                       | 1e-47 | -1.092e+02 | 0.0000 | 10689.0 | 44.98% | 9937.3  | 40.33% | <a href="#">motif file (matrix)</a> | <a href="#">pdf</a> |  |  |
| 46 |  | SCL/HPC7-Scl-ChIP-Seq/Homer                    | 1e-47 | -1.089e+02 | 0.0000 | 23203.0 | 97.64% | 23635.8 | 95.92% | <a href="#">motif file (matrix)</a> | <a href="#">pdf</a> |  |  |
| 47 |  | NRF1/Promoter/Homer                            | 1e-46 | -1.070e+02 | 0.0000 | 1850.0  | 7.79%  | 1362.7  | 5.53%  | <a href="#">motif file (matrix)</a> | <a href="#">pdf</a> |  |  |
| 48 |  | STAT6/Macrophage-Stat6-ChIP-Seq/Homer          | 1e-46 | -1.067e+02 | 0.0000 | 8223.0  | 34.60% | 7458.6  | 30.27% | <a href="#">motif file (matrix)</a> | <a href="#">pdf</a> |  |  |
| 49 |  | HEB?/mES-Nanog-ChIP-Seq/Homer                  | 1e-44 | -1.034e+02 | 0.0000 | 8116.0  | 34.15% | 7368.0  | 29.90% | <a href="#">motif file (matrix)</a> | <a href="#">pdf</a> |  |  |
| 50 |                                                                                     | STAT6(Stat)/CD4-Stat6-ChIP-Seq/Homer           | 1e-43 | -1.013e+02 | 0.0000 | 8282.0  | 34.85% | 7545.4  | 30.62% | <a href="#">motif file (matrix)</a> | <a href="#">pdf</a> |  |  |

|    |  |                                                      |       |            |        |         |        |         |        |                                     |                     |  |  |
|----|--|------------------------------------------------------|-------|------------|--------|---------|--------|---------|--------|-------------------------------------|---------------------|--|--|
|    |  |                                                      |       |            |        |         |        |         |        |                                     |                     |  |  |
| 51 |  | Lhx3(Homeobox)/Forebrain-p300-ChIP-Seq/Homer         | 1e-43 | -1.004e+02 | 0.0000 | 14045.0 | 59.10% | 13459.3 | 54.62% | <a href="#">motif file (matrix)</a> | <a href="#">pdf</a> |  |  |
| 52 |  | RFX(HTH)/K562-RFX3-ChIP-Seq/Homer                    | 1e-42 | -9.874e+01 | 0.0000 | 1233.0  | 5.19%  | 847.7   | 3.44%  | <a href="#">motif file (matrix)</a> | <a href="#">pdf</a> |  |  |
| 53 |  | RXR(NR/DR1)/3T3L1-RXR-ChIP-Seq/Homer                 | 1e-39 | -9.101e+01 | 0.0000 | 13569.0 | 57.10% | 13016.4 | 52.83% | <a href="#">motif file (matrix)</a> | <a href="#">pdf</a> |  |  |
| 54 |  | Oct2(POU/Homeobox)/Bcell-Oct2-ChIP-Seq/Homer         | 1e-39 | -9.062e+01 | 0.0000 | 5927.0  | 24.94% | 5264.4  | 21.36% | <a href="#">motif file (matrix)</a> | <a href="#">pdf</a> |  |  |
| 55 |  | NF1-halfsite(CTF)/LNCaP-NF1-ChIP-Seq/Homer           | 1e-39 | -9.028e+01 | 0.0000 | 17504.0 | 73.66% | 17195.6 | 69.79% | <a href="#">motif file (matrix)</a> | <a href="#">pdf</a> |  |  |
| 56 |  | PU.1(ETS)/ThioMac-PU.1-ChIP-Seq/Homer                | 1e-38 | -8.975e+01 | 0.0000 | 7309.0  | 30.76% | 6634.5  | 26.93% | <a href="#">motif file (matrix)</a> | <a href="#">pdf</a> |  |  |
| 57 |  | TEAD4(TEA)/Tropoblast-Tea4-ChIP-Seq (GSE37350)/Homer | 1e-36 | -8.312e+01 | 0.0000 | 11853.0 | 49.88% | 11283.6 | 45.79% | <a href="#">motif file (matrix)</a> | <a href="#">pdf</a> |  |  |
| 58 |  | GFY-Staf/Promoters/Homer                             | 1e-36 | -8.305e+01 | 0.0000 | 933.0   | 3.93%  | 625.6   | 2.54%  | <a href="#">motif file (matrix)</a> | <a href="#">pdf</a> |  |  |
| 59 |  | Gata2(Zf)/K562-GATA2-ChIP-Seq/Homer                  | 1e-35 | -8.196e+01 | 0.0000 | 9470.0  | 39.85% | 8851.3  | 35.92% | <a href="#">motif file (matrix)</a> | <a href="#">pdf</a> |  |  |
| 60 |  | X-box(HTH)/NPC-H3K4me1-ChIP-Seq/Homer                | 1e-35 | -8.172e+01 | 0.0000 | 1748.0  | 7.36%  | 1336.9  | 5.43%  | <a href="#">motif file (matrix)</a> | <a href="#">pdf</a> |  |  |
| 61 |  | Gata1(Zf)/K562-GATA1-ChIP-Seq/Homer                  | 1e-35 | -8.171e+01 | 0.0000 | 8546.0  | 35.96% | 7918.2  | 32.13% | <a href="#">motif file (matrix)</a> | <a href="#">pdf</a> |  |  |
| 62 |  | MyoD(HLH)/Myotube-MyoD-ChIP-Seq/Homer                | 1e-34 | -7.832e+01 | 0.0000 | 9100.0  | 38.29% | 8498.1  | 34.49% | <a href="#">motif file (matrix)</a> | <a href="#">pdf</a> |  |  |
| 63 |  | Rfx1(HTH)/NPC-Rfx1-ChIP-Seq/Homer                    | 1e-33 | -7.777e+01 | 0.0000 | 2997.0  | 12.61% | 2499.3  | 10.14% | <a href="#">motif file (matrix)</a> | <a href="#">pdf</a> |  |  |



|    |  |                                                   |       |            |        |         |        |         |        |                                     |                     |  |
|----|--|---------------------------------------------------|-------|------------|--------|---------|--------|---------|--------|-------------------------------------|---------------------|--|
|    |  |                                                   |       |            |        |         |        |         |        |                                     |                     |  |
| 64 |  | NFAT(RHD)/Jurkat-NFATC1-ChIP-Seq/Homer            | 1e-32 | -7.499e+01 | 0.0000 | 12589.0 | 52.98% | 12097.1 | 49.09% | <a href="#">motif file (matrix)</a> | <a href="#">pdf</a> |  |
| 65 |  | NFkB-p65(RHD)/GM12787-p65-ChIP-Seq/Homer          | 1e-31 | -7.331e+01 | 0.0000 | 7880.0  | 33.16% | 7298.0  | 29.62% | <a href="#">motif file (matrix)</a> | <a href="#">pdf</a> |  |
| 66 |  | Foxo1(Forkhead)/RAW-Foxo1-ChIP-Seq/Homer          | 1e-31 | -7.276e+01 | 0.0000 | 19235.0 | 80.95% | 19177.0 | 77.83% | <a href="#">motif file (matrix)</a> | <a href="#">pdf</a> |  |
| 67 |  | FOXP1(Forkhead)/H9-FOXP1-ChIP-Seq(GSE31006)/Homer | 1e-29 | -6.763e+01 | 0.0000 | 7250.0  | 30.51% | 6701.3  | 27.20% | <a href="#">motif file (matrix)</a> | <a href="#">pdf</a> |  |
| 68 |  | Gata4(Zf)/Heart-Gata4-ChIP-Seq(GSE35151)/Homer    | 1e-28 | -6.601e+01 | 0.0000 | 13347.0 | 56.17% | 12947.4 | 52.55% | <a href="#">motif file (matrix)</a> | <a href="#">pdf</a> |  |
| 69 |  | Foxa2(Forkhead)/Liver-Foxa2-ChIP-Seq/Homer        | 1e-28 | -6.465e+01 | 0.0000 | 11066.0 | 46.57% | 10595.6 | 43.00% | <a href="#">motif file (matrix)</a> | <a href="#">pdf</a> |  |
| 70 |  | TEAD(TEA)/Fibroblast-PU.1-ChIP-Seq/Homer          | 1e-28 | -6.463e+01 | 0.0000 | 10370.0 | 43.64% | 9881.1  | 40.10% | <a href="#">motif file (matrix)</a> | <a href="#">pdf</a> |  |
| 71 |  | STAT5 (Stat)/mCD4+-Stat5a b-ChIP-Seq/Homer        | 1e-28 | -6.463e+01 | 0.0000 | 5476.0  | 23.04% | 4956.3  | 20.11% | <a href="#">motif file (matrix)</a> | <a href="#">pdf</a> |  |
| 72 |  | Tcf3(HMG)/mES-Tcf3-ChIP-Seq/Homer                 | 1e-27 | -6.312e+01 | 0.0000 | 4068.0  | 17.12% | 3587.6  | 14.56% | <a href="#">motif file (matrix)</a> | <a href="#">pdf</a> |  |
| 73 |  | E2F(E2F)/Cell-Cycle-Exp/Homer                     | 1e-27 | -6.241e+01 | 0.0000 | 725.0   | 3.05%  | 490.6   | 1.99%  | <a href="#">motif file (matrix)</a> | <a href="#">pdf</a> |  |
| 74 |  | Nanog(Homeobox)/mES-Nanog-ChIP-Seq/Homer          | 1e-26 | -6.197e+01 | 0.0000 | 23359.0 | 98.30% | 23956.5 | 97.22% | <a href="#">motif file (matrix)</a> | <a href="#">pdf</a> |  |
| 75 |  | HNF4a(NR/DR1)/HepG2-HNF4a-ChIP-Seq/Homer          | 1e-26 | -6.096e+01 | 0.0000 | 6555.0  | 27.58% | 6048.4  | 24.55% | <a href="#">motif file (matrix)</a> | <a href="#">pdf</a> |  |
| 76 |  | EGR(Zf)/K562-EGR1-ChIP-Seq/Homer                  | 1e-26 | -5.987e+01 | 0.0000 | 2521.0  | 10.61% | 2121.7  | 8.61%  | <a href="#">motif file (matrix)</a> | <a href="#">pdf</a> |  |

|    |                                                                                     |                                                |       |            |        |         |        |         |        |                                     |                     |  |
|----|-------------------------------------------------------------------------------------|------------------------------------------------|-------|------------|--------|---------|--------|---------|--------|-------------------------------------|---------------------|--|
|    |    |                                                |       |            |        |         |        |         |        |                                     |                     |  |
| 77 |    | STAT1(Stat)/HelaS3-STAT1-ChIP-Seq/Homer        | 1e-25 | -5.785e+01 | 0.0000 | 4933.0  | 20.76% | 4460.8  | 18.10% | <a href="#">motif file (matrix)</a> | <a href="#">pdf</a> |  |
| 78 |    | Nur77(NR)/K562-NR4A1-ChIP-Seq(GSE31363)/Homer  | 1e-24 | -5.638e+01 | 0.0000 | 2952.0  | 12.42% | 2545.3  | 10.33% | <a href="#">motif file (matrix)</a> | <a href="#">pdf</a> |  |
| 79 |    | CRE(bZIP)/Promoter/Homer                       | 1e-23 | -5.439e+01 | 0.0000 | 2674.0  | 11.25% | 2290.0  | 9.29%  | <a href="#">motif file (matrix)</a> | <a href="#">pdf</a> |  |
| 80 |    | Znf263(Zf)/K562-Znf263-ChIP-Seq/Homer          | 1e-23 | -5.439e+01 | 0.0000 | 17641.0 | 74.24% | 17568.9 | 71.30% | <a href="#">motif file (matrix)</a> | <a href="#">pdf</a> |  |
| 81 |    | E2F7(E2F)/Hela-E2F7-ChIP-Seq(GSE32673)/Homer   | 1e-23 | -5.408e+01 | 0.0000 | 1687.0  | 7.10%  | 1365.4  | 5.54%  | <a href="#">motif file (matrix)</a> | <a href="#">pdf</a> |  |
| 82 |    | Nr5a2(NR)/mES-Nr5a2-ChIP-Seq/Homer             | 1e-23 | -5.330e+01 | 0.0000 | 7085.0  | 29.82% | 6629.1  | 26.90% | <a href="#">motif file (matrix)</a> | <a href="#">pdf</a> |  |
| 83 |    | Smad2(MAD)/ES-SMAD2-ChIP-Seq(GSE29422)/Homer   | 1e-22 | -5.265e+01 | 0.0000 | 15749.0 | 66.28% | 15568.7 | 63.18% | <a href="#">motif file (matrix)</a> | <a href="#">pdf</a> |  |
| 84 |    | AR-halfsite(NR)/LNCaP-AR-ChIP-Seq/Homer        | 1e-22 | -5.166e+01 | 0.0000 | 22739.0 | 95.69% | 23227.6 | 94.27% | <a href="#">motif file (matrix)</a> | <a href="#">pdf</a> |  |
| 85 |  | EBF(EBF)/proBcell-EBF-ChIP-Seq/Homer           | 1e-21 | -4.855e+01 | 0.0000 | 3325.0  | 13.99% | 2942.1  | 11.94% | <a href="#">motif file (matrix)</a> | <a href="#">pdf</a> |  |
| 86 |  | Smad3(MAD)/NPC-Smad3-ChIP-Seq(GSE36673)/Homer  | 1e-20 | -4.827e+01 | 0.0000 | 21491.0 | 90.44% | 21813.0 | 88.53% | <a href="#">motif file (matrix)</a> | <a href="#">pdf</a> |  |
| 87 |  | GFY(?)/Promoter/Homer                          | 1e-20 | -4.824e+01 | 0.0000 | 1153.0  | 4.85%  | 897.2   | 3.64%  | <a href="#">motif file (matrix)</a> | <a href="#">pdf</a> |  |
| 88 |  | GATA3(Zf)/iTreg-Gata3-ChIP-Seq(GSE20898)/Homer | 1e-20 | -4.809e+01 | 0.0000 | 17237.0 | 72.54% | 17183.5 | 69.74% | <a href="#">motif file (matrix)</a> | <a href="#">pdf</a> |  |
| 89 |                                                                                     | JunD(bZIP)/K562-JunD-ChIP-Seq/Homer            | 1e-20 | -4.783e+01 | 0.0000 | 1135.0  | 4.78%  | 882.5   | 3.58%  | <a href="#">motif file (matrix)</a> | <a href="#">pdf</a> |  |

|     |  |                                                |       |            |        |         |        |         |        |                                     |                     |  |
|-----|--|------------------------------------------------|-------|------------|--------|---------|--------|---------|--------|-------------------------------------|---------------------|--|
|     |  |                                                |       |            |        |         |        |         |        |                                     |                     |  |
| 90  |  | GFX(?)/Promoter/Homer                          | 1e-20 | -4.746e+01 | 0.0000 | 228.0   | 0.96%  | 118.6   | 0.48%  | <a href="#">motif file (matrix)</a> | <a href="#">pdf</a> |  |
| 91  |  | Sp1(Zf)/Promoter/Homer                         | 1e-20 | -4.736e+01 | 0.0000 | 4076.0  | 17.15% | 3680.4  | 14.94% | <a href="#">motif file (matrix)</a> | <a href="#">pdf</a> |  |
| 92  |  | NFAT:AP1/Jurkat-NFATC1-ChIP-Seq/Homer          | 1e-19 | -4.401e+01 | 0.0000 | 3111.0  | 13.09% | 2759.7  | 11.20% | <a href="#">motif file (matrix)</a> | <a href="#">pdf</a> |  |
| 93  |  | BORIS(Zf)/K562-CTCF-ChIP-Seq/Homer             | 1e-18 | -4.327e+01 | 0.0000 | 2607.0  | 10.97% | 2277.2  | 9.24%  | <a href="#">motif file (matrix)</a> | <a href="#">pdf</a> |  |
| 94  |  | PPARE(NR/DR1)/3T3L1-Pparg-ChIP-Seq/Homer       | 1e-18 | -4.295e+01 | 0.0000 | 12130.0 | 51.05% | 11864.8 | 48.15% | <a href="#">motif file (matrix)</a> | <a href="#">pdf</a> |  |
| 95  |  | Smad4(MAD)/ESC-SMAD4-ChIP-Seq(GSE29422)/Homer  | 1e-18 | -4.218e+01 | 0.0000 | 15832.0 | 66.62% | 15741.7 | 63.89% | <a href="#">motif file (matrix)</a> | <a href="#">pdf</a> |  |
| 96  |  | MafK(bZIP)/C2C12-MafK-ChIP-Seq(GSE36030)/Homer | 1e-18 | -4.200e+01 | 0.0000 | 3283.0  | 13.82% | 2937.8  | 11.92% | <a href="#">motif file (matrix)</a> | <a href="#">pdf</a> |  |
| 97  |  | Egr2/Thymocytes-Egr2-ChIP-Seq(GSE34254)/Homer  | 1e-18 | -4.172e+01 | 0.0000 | 2210.0  | 9.30%  | 1905.3  | 7.73%  | <a href="#">motif file (matrix)</a> | <a href="#">pdf</a> |  |
| 98  |  | Tcf12(HLH)/GM12878-Tcf12-ChIP-Seq/Homer        | 1e-17 | -3.956e+01 | 0.0000 | 10997.0 | 46.28% | 10724.3 | 43.52% | <a href="#">motif file (matrix)</a> | <a href="#">pdf</a> |  |
| 99  |  | HIF2a(HLH)/O785-HIF2a-ChIP-Seq(GSE34871)/Homer | 1e-16 | -3.913e+01 | 0.0000 | 4669.0  | 19.65% | 4317.4  | 17.52% | <a href="#">motif file (matrix)</a> | <a href="#">pdf</a> |  |
| 100 |  | Tcfcp211(CP2)/mES-Tcfcp211-ChIP-Seq/Homer      | 1e-16 | -3.878e+01 | 0.0000 | 1902.0  | 8.00%  | 1626.6  | 6.60%  | <a href="#">motif file (matrix)</a> | <a href="#">pdf</a> |  |
| 101 |  | CTCF(Zf)/CD4+-CTCF-ChIP-Seq/Homer              | 1e-16 | -3.877e+01 | 0.0000 | 1608.0  | 6.77%  | 1349.7  | 5.48%  | <a href="#">motif file (matrix)</a> | <a href="#">pdf</a> |  |
| 102 |  | Hoxb4/ES-Hoxb4-ChIP-Seq(GSE34014)/Homer        | 1e-16 | -3.852e+01 | 0.0000 | 3026.0  | 12.73% | 2707.7  | 10.99% | <a href="#">motif file (matrix)</a> | <a href="#">pdf</a> |  |

|     |                                                                                     |                                                     |       |            |        |         |        |         |        |                                     |                     |  |
|-----|-------------------------------------------------------------------------------------|-----------------------------------------------------|-------|------------|--------|---------|--------|---------|--------|-------------------------------------|---------------------|--|
|     |    |                                                     |       |            |        |         |        |         |        |                                     |                     |  |
| 103 |    | Pdx1(Homeobox)/Isl1-Pdx1-ChIP-Seq/Homer             | 1e-16 | -3.769e+01 | 0.0000 | 12506.0 | 52.63% | 12302.7 | 49.93% | <a href="#">motif file (matrix)</a> | <a href="#">pdf</a> |  |
| 104 |    | PR(NR)/T47D-PR-ChIP-Seq (GSE31130)/Homer            | 1e-16 | -3.687e+01 | 0.0000 | 19440.0 | 81.81% | 19635.3 | 79.69% | <a href="#">motif file (matrix)</a> | <a href="#">pdf</a> |  |
| 105 |    | PRDM1/BMI1(Zf)/Hela-PRDM1-ChIP-Seq (GSE31477)/Homer | 1e-15 | -3.597e+01 | 0.0000 | 9034.0  | 38.02% | 8743.0  | 35.48% | <a href="#">motif file (matrix)</a> | <a href="#">pdf</a> |  |
| 106 |    | Rfx5(HTH)/GM12878-Rfx5-ChIP-Seq(GSE31477)/Homer     | 1e-14 | -3.335e+01 | 0.0000 | 4657.0  | 19.60% | 4347.2  | 17.64% | <a href="#">motif file (matrix)</a> | <a href="#">pdf</a> |  |
| 107 |    | PRDM14(Zf)/H1-PRDM14-ChIP-Seq/Homer                 | 1e-13 | -3.150e+01 | 0.0000 | 4491.0  | 18.90% | 4196.6  | 17.03% | <a href="#">motif file (matrix)</a> | <a href="#">pdf</a> |  |
| 108 |    | CArG(MADS)/PUER-Srf-ChIP-Seq/Homer                  | 1e-13 | -3.121e+01 | 0.0000 | 4869.0  | 20.49% | 4575.7  | 18.57% | <a href="#">motif file (matrix)</a> | <a href="#">pdf</a> |  |
| 109 |    | Hoxc9/Ainv15-Hoxc9-ChIP-Seq/Homer                   | 1e-13 | -3.005e+01 | 0.0000 | 8059.0  | 33.91% | 7805.0  | 31.68% | <a href="#">motif file (matrix)</a> | <a href="#">pdf</a> |  |
| 110 |    | ZBTB33/GM12878-ZBTB33-ChIP-Seq/Homer                | 1e-12 | -2.956e+01 | 0.0000 | 492.0   | 2.07%  | 361.2   | 1.47%  | <a href="#">motif file (matrix)</a> | <a href="#">pdf</a> |  |
| 111 |  | Tcf4(HMG)/Hct116-Tcf4-ChIP-Seq/Homer                | 1e-12 | -2.872e+01 | 0.0000 | 6774.0  | 28.51% | 6514.0  | 26.44% | <a href="#">motif file (matrix)</a> | <a href="#">pdf</a> |  |
| 112 |  | ATF3(bZIP)/K562-ATF3-ChIP-Seq/Homer                 | 1e-12 | -2.866e+01 | 0.0000 | 2166.0  | 9.12%  | 1930.6  | 7.83%  | <a href="#">motif file (matrix)</a> | <a href="#">pdf</a> |  |
| 113 |  | Nr5a2(NR)/Pancreas-LRH1-ChIP-Seq(GSE34295)/Homer    | 1e-12 | -2.864e+01 | 0.0000 | 9206.0  | 38.74% | 8991.1  | 36.49% | <a href="#">motif file (matrix)</a> | <a href="#">pdf</a> |  |
| 114 |  | E2F1(E2F)/Hela-E2F1-ChIP-Seq/Hoemr                  | 1e-12 | -2.844e+01 | 0.0000 | 3188.0  | 13.42% | 2929.8  | 11.89% | <a href="#">motif file (matrix)</a> | <a href="#">pdf</a> |  |
| 115 |                                                                                     | NFY (CCAAT)/Promoter/Homer                          | 1e-12 | -2.799e+01 | 0.0000 | 9759.0  | 41.07% | 9566.0  | 38.82% | <a href="#">motif file (matrix)</a> | <a href="#">pdf</a> |  |

|     |  |                                                                 |       |            |        |         |        |         |        |                                     |                     |  |
|-----|--|-----------------------------------------------------------------|-------|------------|--------|---------|--------|---------|--------|-------------------------------------|---------------------|--|
|     |  |                                                                 |       |            |        |         |        |         |        |                                     |                     |  |
| 116 |  | Myf5(bHLH)/GM-Myf5-ChIP-Seq(GSE24852)/Homer                     | 1e-12 | -2.770e+01 | 0.0000 | 8322.0  | 35.02% | 8097.6  | 32.86% | <a href="#">motif file (matrix)</a> | <a href="#">pdf</a> |  |
| 117 |  | Foxh1(Forkhead)/hESC-FOXH1-ChIP-Seq(GSE29422)/Homer             | 1e-11 | -2.673e+01 | 0.0000 | 9150.0  | 38.51% | 8954.3  | 36.34% | <a href="#">motif file (matrix)</a> | <a href="#">pdf</a> |  |
| 118 |  | Esrrb(NR)/mES-Esrrb-ChIP-Seq/Homer                              | 1e-11 | -2.630e+01 | 0.0000 | 8957.0  | 37.69% | 8761.8  | 35.56% | <a href="#">motif file (matrix)</a> | <a href="#">pdf</a> |  |
| 119 |  | Six1(Homeobox)/Myoblast-Six1-ChIP-Chip(GSE20150)/Homer          | 1e-11 | -2.625e+01 | 0.0000 | 3845.0  | 16.18% | 3595.2  | 14.59% | <a href="#">motif file (matrix)</a> | <a href="#">pdf</a> |  |
| 120 |  | VDR(NR/DR3)/GM10855-VDR+vitD-ChIP-Seq/Homer                     | 1e-11 | -2.601e+01 | 0.0000 | 3214.0  | 13.53% | 2972.3  | 12.06% | <a href="#">motif file (matrix)</a> | <a href="#">pdf</a> |  |
| 121 |  | Unknown/Homeobox/Limb-p300-ChIP-Seq/Homer                       | 1e-10 | -2.510e+01 | 0.0000 | 10355.0 | 43.58% | 10210.5 | 41.44% | <a href="#">motif file (matrix)</a> | <a href="#">pdf</a> |  |
| 122 |  | IRF4(IRF)/GM12878-IRF4-ChIP-Seq/Homer                           | 1e-10 | -2.489e+01 | 0.0000 | 6773.0  | 28.50% | 6550.9  | 26.59% | <a href="#">motif file (matrix)</a> | <a href="#">pdf</a> |  |
| 123 |  | NFkB-p65-Rel(RHD)/LPS-exp/Homer                                 | 1e-10 | -2.481e+01 | 0.0000 | 979.0   | 4.12%  | 818.5   | 3.32%  | <a href="#">motif file (matrix)</a> | <a href="#">pdf</a> |  |
| 124 |  | ETS:E-box/HPC7-ScI-ChIP-Seq/Homer                               | 1e-10 | -2.335e+01 | 0.0000 | 1434.0  | 6.03%  | 1255.8  | 5.10%  | <a href="#">motif file (matrix)</a> | <a href="#">pdf</a> |  |
| 125 |  | Atoh1(bHLH)/Cerebellum-Atoh1-ChIP-Seq/Homer                     | 1e-9  | -2.283e+01 | 0.0000 | 12396.0 | 52.17% | 12347.3 | 50.11% | <a href="#">motif file (matrix)</a> | <a href="#">pdf</a> |  |
| 126 |  | PRDM9(Zf)/Testis-DMC1-ChIP-Seq(GSE35498)/Homer                  | 1e-7  | -1.778e+01 | 0.0000 | 5538.0  | 23.31% | 5376.0  | 21.82% | <a href="#">motif file (matrix)</a> | <a href="#">pdf</a> |  |
| 127 |  | MafF(bZIP)/HepG2-MafF-ChIP-Seq(GSE31477)/Homer                  | 1e-7  | -1.705e+01 | 0.0000 | 5257.0  | 22.12% | 5100.6  | 20.70% | <a href="#">motif file (matrix)</a> | <a href="#">pdf</a> |  |
| 128 |  | PAX3:FKHR-fusion (Paired/Homeobox)/Rh4-PAX3:FKHR-ChIP-Seq/Homer | 1e-7  | -1.672e+01 | 0.0000 | 3263.0  | 13.73% | 3098.6  | 12.58% | <a href="#">motif file (matrix)</a> | <a href="#">pdf</a> |  |

|     |                                                                                     |                                                      |      |            |        |         |        |         |        |                                     |                     |  |
|-----|-------------------------------------------------------------------------------------|------------------------------------------------------|------|------------|--------|---------|--------|---------|--------|-------------------------------------|---------------------|--|
|     |    |                                                      |      |            |        |         |        |         |        |                                     |                     |  |
| 129 |    | HIF-1a(HLH)/MCF7-HIF1a-ChIP-Seq/Homer                | 1e-7 | -1.671e+01 | 0.0000 | 3417.0  | 14.38% | 3252.8  | 13.20% | <a href="#">motif file (matrix)</a> | <a href="#">pdf</a> |  |
| 130 |    | Olig2(bHLH)/Neuron-Olig2-ChIP-Seq(GSE30882)/Homer    | 1e-7 | -1.623e+01 | 0.0000 | 18323.0 | 77.11% | 18643.5 | 75.66% | <a href="#">motif file (matrix)</a> | <a href="#">pdf</a> |  |
| 131 |    | RUNX1(Runt)/Jurkat-RUNX1-ChIP-Seq/Homer              | 1e-7 | -1.618e+01 | 0.0000 | 12353.0 | 51.98% | 12392.7 | 50.29% | <a href="#">motif file (matrix)</a> | <a href="#">pdf</a> |  |
| 132 |    | HOXA9/HSC-Hoxa9-ChIP-Seq(GSE33509)/Homer             | 1e-6 | -1.489e+01 | 0.0000 | 9734.0  | 40.96% | 9704.3  | 39.38% | <a href="#">motif file (matrix)</a> | <a href="#">pdf</a> |  |
| 133 |    | MyoG(HLH)/C2C12-MyoG-ChIP-Seq(GSE36024)/Homer        | 1e-6 | -1.445e+01 | 0.0000 | 11546.0 | 48.59% | 11582.4 | 47.01% | <a href="#">motif file (matrix)</a> | <a href="#">pdf</a> |  |
| 134 |    | HOXA2(Homeobox)/mES-Hoxa2-ChIP-Seq/Homer             | 1e-6 | -1.444e+01 | 0.0000 | 1525.0  | 6.42%  | 1397.4  | 5.67%  | <a href="#">motif file (matrix)</a> | <a href="#">pdf</a> |  |
| 135 |    | GATA-IR4(Zf)/iTreg-Gata3-ChIP-Seq(GSE20898)/Homer    | 1e-5 | -1.220e+01 | 0.0000 | 1260.0  | 5.30%  | 1154.1  | 4.68%  | <a href="#">motif file (matrix)</a> | <a href="#">pdf</a> |  |
| 136 |    | TCFL2(HMG)/K562-TCF7L2-ChIP-Seq(GSE29196)/Homer      | 1e-5 | -1.198e+01 | 0.0000 | 1242.0  | 5.23%  | 1138.5  | 4.62%  | <a href="#">motif file (matrix)</a> | <a href="#">pdf</a> |  |
| 137 |  | Tbx20(T-box)/Heart-Tbx20-ChIP-Seq(GSE29636)/Homer    | 1e-4 | -1.107e+01 | 0.0000 | 2813.0  | 11.84% | 2706.3  | 10.98% | <a href="#">motif file (matrix)</a> | <a href="#">pdf</a> |  |
| 138 |  | NeuroD1(bHLH)/Islet-NeuroD1-ChIP-Seq(GSE30298)/Homer | 1e-4 | -1.093e+01 | 0.0000 | 10114.0 | 42.56% | 10161.3 | 41.24% | <a href="#">motif file (matrix)</a> | <a href="#">pdf</a> |  |
| 139 |  | Eomes(T-box)/H9-Eomes-ChIP-Seq/Homer                 | 1e-4 | -1.051e+01 | 0.0000 | 22746.0 | 95.72% | 23449.9 | 95.17% | <a href="#">motif file (matrix)</a> | <a href="#">pdf</a> |  |
| 140 |  | E-box(HLH)/Promoter/Homer                            | 1e-4 | -1.007e+01 | 0.0001 | 971.0   | 4.09%  | 887.4   | 3.60%  | <a href="#">motif file (matrix)</a> | <a href="#">pdf</a> |  |
| 141 |                                                                                     | GATA:SCL/Ter119-SCL-ChIP-Seq/Homer                   | 1e-4 | -9.642e+00 | 0.0001 | 1713.0  | 7.21%  | 1622.7  | 6.59%  | <a href="#">motif file (matrix)</a> | <a href="#">pdf</a> |  |

|     |                                                                                     |                                                   |      |            |        |         |        |         |        |                                     |                     |  |  |
|-----|-------------------------------------------------------------------------------------|---------------------------------------------------|------|------------|--------|---------|--------|---------|--------|-------------------------------------|---------------------|--|--|
|     |   |                                                   |      |            |        |         |        |         |        |                                     |                     |  |  |
| 142 |    | c-Myc(HLH)/LNCAP-cMyc-ChIP-Seq/Homer              | 1e-4 | -9.430e+00 | 0.0001 | 5048.0  | 21.24% | 4990.0  | 20.25% | <a href="#">motif file (matrix)</a> | <a href="#">pdf</a> |  |  |
| 143 |    | GRE(NR/IR3)/A549-GR-ChIP-Seq/Homer                | 1e-3 | -8.980e+00 | 0.0002 | 1613.0  | 6.79%  | 1530.0  | 6.21%  | <a href="#">motif file (matrix)</a> | <a href="#">pdf</a> |  |  |
| 144 |    | Tbox:Smad/ESCd5-Smad2_3-ChIP-Seq (GSE29422)/Homer | 1e-3 | -8.267e+00 | 0.0004 | 2783.0  | 11.71% | 2710.8  | 11.00% | <a href="#">motif file (matrix)</a> | <a href="#">pdf</a> |  |  |
| 145 |    | ARE(NR)/LNCAP-AR-ChIP-Seq/Homer                   | 1e-3 | -8.043e+00 | 0.0005 | 3075.0  | 12.94% | 3008.1  | 12.21% | <a href="#">motif file (matrix)</a> | <a href="#">pdf</a> |  |  |
| 146 |    | GRE/RAW264.7-GRE-ChIP-Seq/Homer                   | 1e-3 | -7.589e+00 | 0.0007 | 2945.0  | 12.39% | 2883.4  | 11.70% | <a href="#">motif file (matrix)</a> | <a href="#">pdf</a> |  |  |
| 147 |   | HRE(HSF)/HepG2-HSF1-ChIP-Seq/Homer                | 1e-3 | -7.322e+00 | 0.0010 | 2021.0  | 8.50%  | 1955.4  | 7.94%  | <a href="#">motif file (matrix)</a> | <a href="#">pdf</a> |  |  |
| 148 |    | Pbx3(Homeobox)/GM12878-PBX3-ChIP-Seq/Homer        | 1e-3 | -7.278e+00 | 0.0010 | 3065.0  | 12.90% | 3009.4  | 12.21% | <a href="#">motif file (matrix)</a> | <a href="#">pdf</a> |  |  |
| 149 |    | ZNF711(Zf)/SH-SY5Y-ZNF711-ChIP-Seq/Homer          | 1e-3 | -7.047e+00 | 0.0013 | 17434.0 | 73.37% | 17854.7 | 72.46% | <a href="#">motif file (matrix)</a> | <a href="#">pdf</a> |  |  |
| 150 |  | FOXA1(Forkhead)/LNCAP-FOXA1-ChIP-Seq/Homer        | 1e-2 | -6.716e+00 | 0.0017 | 15275.0 | 64.28% | 15605.9 | 63.33% | <a href="#">motif file (matrix)</a> | <a href="#">pdf</a> |  |  |
| 151 |  | Tlx?/NPC-H3K4me1-ChIP-Seq/Homer                   | 1e-2 | -6.574e+00 | 0.0020 | 5555.0  | 23.38% | 5559.9  | 22.56% | <a href="#">motif file (matrix)</a> | <a href="#">pdf</a> |  |  |
| 152 |  | RUNX(Runt)/HPC7-Runx1-ChIP-Seq/Homer              | 1e-2 | -6.417e+00 | 0.0023 | 8830.0  | 37.16% | 8929.5  | 36.24% | <a href="#">motif file (matrix)</a> | <a href="#">pdf</a> |  |  |
| 153 |  | TR4(NR/DR1)/Hela-TR4-ChIP-Seq/Homer               | 1e-2 | -6.188e+00 | 0.0029 | 1529.0  | 6.43%  | 1475.9  | 5.99%  | <a href="#">motif file (matrix)</a> | <a href="#">pdf</a> |  |  |
| 154 |                                                                                     | GLI3(Zf)/GLI3-ChIP-Chip/Homer                     | 1e-2 | -5.898e+00 | 0.0038 | 1816.0  | 7.64%  | 1767.4  | 7.17%  | <a href="#">motif file (matrix)</a> | <a href="#">pdf</a> |  |  |

|     |  |                                        |      |            |        |        |        |        |        |                                     |                     |  |
|-----|--|----------------------------------------|------|------------|--------|--------|--------|--------|--------|-------------------------------------|---------------------|--|
|     |  |                                        |      |            |        |        |        |        |        |                                     |                     |  |
| 155 |  | NFkB-p50,p52(RHD)/p50-ChIP-Chip/Homer  | 1e-2 | -5.772e+00 | 0.0043 | 1716.0 | 7.22%  | 1668.6 | 6.77%  | <a href="#">motif file (matrix)</a> | <a href="#">pdf</a> |  |
| 156 |  | ISRE(IRF)/ThioMac-LPS-exp/HOMER        | 1e-2 | -5.755e+00 | 0.0044 | 1069.0 | 4.50%  | 1020.6 | 4.14%  | <a href="#">motif file (matrix)</a> | <a href="#">pdf</a> |  |
| 157 |  | USF1 (HLH)/GM12878-Usf1-ChIP-Seq/Homer | 1e-2 | -5.552e+00 | 0.0053 | 5523.0 | 23.24% | 5549.0 | 22.52% | <a href="#">motif file (matrix)</a> | <a href="#">pdf</a> |  |
| 158 |  | ETS:RUNX/Jurkat-RUNX1-ChIP-Seq/Homer   | 1e-2 | -5.113e+00 | 0.0082 | 1450.0 | 6.10%  | 1409.7 | 5.72%  | <a href="#">motif file (matrix)</a> | <a href="#">pdf</a> |  |



## **Results homer motif enrichments (known motifs)**

TCam-2 h3k4me3

## Homer Known Motif Enrichment Results

[Homer de novo Motif Results](#)

[Gene Ontology Enrichment Results](#)

[Known Motif Enrichment Results \(txt file\)](#)

Total Target Sequences = 29429, Total Background Sequences = 25640

| Rank | Motif                                                                               | Name                                              | P-value | log P-pvalue | q-value (Benjamini) | # Target Sequences with Motif | % of Targets Sequences with Motif | # Background Sequences with Motif | % of Background Sequences with Motif | Motif File                          | PDF                 |
|------|-------------------------------------------------------------------------------------|---------------------------------------------------|---------|--------------|---------------------|-------------------------------|-----------------------------------|-----------------------------------|--------------------------------------|-------------------------------------|---------------------|
| 1    |    | Maz(Zf)/HepG2-Maz-ChIP-Seq (GSE31477)/Homer       | 1e-416  | -9.582e+02   | 0.0000              | 23161.0                       | 78.70%                            | 17229.8                           | 67.20%                               | <a href="#">motif file (matrix)</a> | <a href="#">pdf</a> |
| 2    |    | Elk4(ETS)/Hela-Elk4-ChIP-Seq (GSE31477)/Homer     | 1e-177  | -4.083e+02   | 0.0000              | 12630.0                       | 42.92%                            | 8948.2                            | 34.90%                               | <a href="#">motif file (matrix)</a> | <a href="#">pdf</a> |
| 3    |   | GFY-Staf/Promoters/Homer                          | 1e-162  | -3.733e+02   | 0.0000              | 1975.0                        | 6.71%                             | 886.1                             | 3.46%                                | <a href="#">motif file (matrix)</a> | <a href="#">pdf</a> |
| 4    |    | Fli1(ETS)/CD8-FLI-ChIP-Seq (GSE20898)/Homer       | 1e-156  | -3.595e+02   | 0.0000              | 18676.0                       | 63.46%                            | 14309.3                           | 55.81%                               | <a href="#">motif file (matrix)</a> | <a href="#">pdf</a> |
| 5    |    | Elk1(ETS)/Hela-Elk1-ChIP-Seq (GSE31477)/Homer     | 1e-155  | -3.577e+02   | 0.0000              | 12387.0                       | 42.09%                            | 8874.2                            | 34.61%                               | <a href="#">motif file (matrix)</a> | <a href="#">pdf</a> |
| 6    |    | EBF1(EBF)/Near-E2A-ChIP-Seq/Homer                 | 1e-136  | -3.154e+02   | 0.0000              | 19273.0                       | 65.49%                            | 14973.0                           | 58.39%                               | <a href="#">motif file (matrix)</a> | <a href="#">pdf</a> |
| 7    |  | BMXB(HTH)/Hela-BMYB-ChIPSeq(GSE27030)/Homer       | 1e-124  | -2.870e+02   | 0.0000              | 19924.0                       | 67.70%                            | 15646.5                           | 61.02%                               | <a href="#">motif file (matrix)</a> | <a href="#">pdf</a> |
| 8    |  | E2F4(E2F)/K562-E2F4-ChIP-Seq(GSE31477)/Homer      | 1e-121  | -2.804e+02   | 0.0000              | 11943.0                       | 40.58%                            | 8718.4                            | 34.00%                               | <a href="#">motif file (matrix)</a> | <a href="#">pdf</a> |
| 9    |  | FOXP1(Forkhead)/H9-FOXP1-ChIP-Seq(GSE31006)/Homer | 1e-114  | -2.632e+02   | 0.0000              | 7775.0                        | 26.42%                            | 5350.5                            | 20.87%                               | <a href="#">motif file (matrix)</a> | <a href="#">pdf</a> |
| 10   |  | YY1(Zf)/Promoter/Homer                            | 1e-111  | -2.566e+02   | 0.0000              | 2388.0                        | 8.11%                             | 1285.9                            | 5.02%                                | <a href="#">motif file (matrix)</a> | <a href="#">pdf</a> |
| 11   |                                                                                     | Foxa2(Forkhead)/Liver-Foxa2-ChIP-Seq/Homer        | 1e-108  | -2.500e+02   | 0.0000              | 11804.0                       | 40.11%                            | 8694.4                            | 33.91%                               | <a href="#">motif file (matrix)</a> | <a href="#">pdf</a> |

|    |                                                                                     |                                                            |        |            |        |         |        |         |        |                                     |                     |  |
|----|-------------------------------------------------------------------------------------|------------------------------------------------------------|--------|------------|--------|---------|--------|---------|--------|-------------------------------------|---------------------|--|
|    |    |                                                            |        |            |        |         |        |         |        |                                     |                     |  |
| 12 |    | AP-2alpha(AP2)/Hela-AP2alpha-ChIP-Seq/Homer                | 1e-106 | -2.441e+02 | 0.0000 | 17620.0 | 59.87% | 13725.7 | 53.53% | <a href="#">motif file (matrix)</a> | <a href="#">pdf</a> |  |
| 13 |    | Sp1(Zf)/Promoter/Homer                                     | 1e-93  | -2.157e+02 | 0.0000 | 10239.0 | 34.79% | 7498.9  | 29.25% | <a href="#">motif file (matrix)</a> | <a href="#">pdf</a> |  |
| 14 |    | ELF1(ETS)/Jurkat-ELF1-ChIP-Seq/Homer                       | 1e-93  | -2.153e+02 | 0.0000 | 11147.0 | 37.88% | 8256.3  | 32.20% | <a href="#">motif file (matrix)</a> | <a href="#">pdf</a> |  |
| 15 |    | NFAT(RHD)/Jurkat-NFATC1-ChIP-Seq/Homer                     | 1e-91  | -2.102e+02 | 0.0000 | 13920.0 | 47.30% | 10624.9 | 41.44% | <a href="#">motif file (matrix)</a> | <a href="#">pdf</a> |  |
| 16 |    | E2F6(E2F)/Hela-E2F6-ChIP-Seq(GSE31477)/Homer               | 1e-82  | -1.903e+02 | 0.0000 | 13440.0 | 45.67% | 10287.0 | 40.12% | <a href="#">motif file (matrix)</a> | <a href="#">pdf</a> |  |
| 17 |    | ETV1(ETS)/GIST48-ETV1-ChIP-Seq/Homer                       | 1e-82  | -1.896e+02 | 0.0000 | 20124.0 | 68.38% | 16158.8 | 63.02% | <a href="#">motif file (matrix)</a> | <a href="#">pdf</a> |  |
| 18 |    | OCT4-SOX2-TCF-NANOG ((POU/Homeobox/HMG)/mES-ChIP-Seq/Homer | 1e-81  | -1.883e+02 | 0.0000 | 3732.0  | 12.68% | 2377.7  | 9.27%  | <a href="#">motif file (matrix)</a> | <a href="#">pdf</a> |  |
| 19 |    | MYB(HTH)/ERMYB-Myb-ChIPSeq(GSE22095)/Homer                 | 1e-80  | -1.843e+02 | 0.0000 | 21495.0 | 73.04% | 17423.6 | 67.95% | <a href="#">motif file (matrix)</a> | <a href="#">pdf</a> |  |
| 20 |  | AP2gamma(AP2)/MCF7-TFAP2c-ChIP-Seq/Homer                   | 1e-78  | -1.818e+02 | 0.0000 | 17417.0 | 59.19% | 13774.1 | 53.72% | <a href="#">motif file (matrix)</a> | <a href="#">pdf</a> |  |
| 21 |  | ERG(ETS)/VCaP-ERG-ChIP-Seq/Homer                           | 1e-77  | -1.779e+02 | 0.0000 | 21428.0 | 72.82% | 17386.8 | 67.81% | <a href="#">motif file (matrix)</a> | <a href="#">pdf</a> |  |
| 22 |  | GABPA(ETS)/Jurkat-GABPa-ChIP-Seq/Homer                     | 1e-77  | -1.777e+02 | 0.0000 | 15246.0 | 51.81% | 11891.0 | 46.38% | <a href="#">motif file (matrix)</a> | <a href="#">pdf</a> |  |
| 23 |  | p53(p53)/mES-cMyc-ChIP-Seq/Homer                           | 1e-76  | -1.769e+02 | 0.0000 | 917.0   | 3.12%  | 406.4   | 1.59%  | <a href="#">motif file (matrix)</a> | <a href="#">pdf</a> |  |
| 24 |                                                                                     | NFkB-p65(RHD)/GM12787-p65-ChIP-Seq/Homer                   | 1e-74  | -1.727e+02 | 0.0000 | 10622.0 | 36.09% | 7966.9  | 31.07% | <a href="#">motif file (matrix)</a> | <a href="#">pdf</a> |  |

|    |  |                                                      |       |            |        |         |        |         |        |                                     |                     |  |
|----|--|------------------------------------------------------|-------|------------|--------|---------|--------|---------|--------|-------------------------------------|---------------------|--|
|    |  |                                                      |       |            |        |         |        |         |        |                                     |                     |  |
| 25 |  | CTCF(Zf)/CD4+-CTCF-ChIP-Seq/Homer                    | 1e-74 | -1.724e+02 | 0.0000 | 3103.0  | 10.54% | 1938.3  | 7.56%  | <a href="#">motif file (matrix)</a> | <a href="#">pdf</a> |  |
| 26 |  | ETS(ETS)/Promoter/Homer                              | 1e-74 | -1.721e+02 | 0.0000 | 7104.0  | 24.14% | 5069.8  | 19.77% | <a href="#">motif file (matrix)</a> | <a href="#">pdf</a> |  |
| 27 |  | Oct4(POU/Homeobox)/mES-Oct4-ChIP-Seq/Homer           | 1e-73 | -1.691e+02 | 0.0000 | 7927.0  | 26.94% | 5748.6  | 22.42% | <a href="#">motif file (matrix)</a> | <a href="#">pdf</a> |  |
| 28 |  | STAT6/Macrophage-Stat6-ChIP-Seq/Homer                | 1e-71 | -1.650e+02 | 0.0000 | 8713.0  | 29.61% | 6407.2  | 24.99% | <a href="#">motif file (matrix)</a> | <a href="#">pdf</a> |  |
| 29 |  | Sox3(HMG)/NPC-Sox3-ChIP-Seq(GSE33059)/Homer          | 1e-65 | -1.511e+02 | 0.0000 | 19941.0 | 67.76% | 16147.9 | 62.98% | <a href="#">motif file (matrix)</a> | <a href="#">pdf</a> |  |
| 30 |  | ETS1(ETS)/Jurkat-ETS1-ChIP-Seq/Homer                 | 1e-64 | -1.497e+02 | 0.0000 | 16495.0 | 56.05% | 13097.5 | 51.08% | <a href="#">motif file (matrix)</a> | <a href="#">pdf</a> |  |
| 31 |  | Bcl6(Zf)/Liver-Bcl6-ChIP-Seq(GSE31578)/Homer         | 1e-61 | -1.422e+02 | 0.0000 | 18731.0 | 63.65% | 15104.4 | 58.91% | <a href="#">motif file (matrix)</a> | <a href="#">pdf</a> |  |
| 32 |  | Egr2/Thymocytes-Egr2-ChIP-Seq(GSE34254)/Homer        | 1e-57 | -1.313e+02 | 0.0000 | 5701.0  | 19.37% | 4070.5  | 15.87% | <a href="#">motif file (matrix)</a> | <a href="#">pdf</a> |  |
| 33 |  | SPDEF(ETS)/VCaP-SPDEF-ChIP-Seq/Homer                 | 1e-56 | -1.305e+02 | 0.0000 | 15683.0 | 53.29% | 12474.3 | 48.65% | <a href="#">motif file (matrix)</a> | <a href="#">pdf</a> |  |
| 34 |  | CHR/Cell-Cycle-Exp/Homer                             | 1e-55 | -1.277e+02 | 0.0000 | 10432.0 | 35.45% | 7986.2  | 31.15% | <a href="#">motif file (matrix)</a> | <a href="#">pdf</a> |  |
| 35 |  | EWS:FLI1-fusion(ETS)/SK_N_MC-EWS:FLI1-ChIP-Seq/Homer | 1e-52 | -1.219e+02 | 0.0000 | 10174.0 | 34.57% | 7794.1  | 30.40% | <a href="#">motif file (matrix)</a> | <a href="#">pdf</a> |  |
| 36 |  | Znf263(Zf)/K562-Znf263-ChIP-Seq/Homer                | 1e-52 | -1.212e+02 | 0.0000 | 24243.0 | 82.38% | 20206.8 | 78.81% | <a href="#">motif file (matrix)</a> | <a href="#">pdf</a> |  |
| 37 |  | EWS:ERG-fusion(ETS)/CADO_ES1-EWS:ERG-ChIP-Seq/Homer  | 1e-51 | -1.180e+02 | 0.0000 | 11640.0 | 39.55% | 9052.8  | 35.31% | <a href="#">motif file (matrix)</a> | <a href="#">pdf</a> |  |

|    |  |                                                   |       |            |        |         |        |         |        |                                     |                     |  |
|----|--|---------------------------------------------------|-------|------------|--------|---------|--------|---------|--------|-------------------------------------|---------------------|--|
|    |  |                                                   |       |            |        |         |        |         |        |                                     |                     |  |
| 38 |  | STAT6(Stat)/CD4-Stat6-ChIP-Seq/Homer              | 1e-51 | -1.180e+02 | 0.0000 | 8660.0  | 29.43% | 6544.8  | 25.53% | <a href="#">motif file (matrix)</a> | <a href="#">pdf</a> |  |
| 39 |  | Stat3(Stat)/mES-Stat3-ChIP-Seq/Homer              | 1e-50 | -1.169e+02 | 0.0000 | 9397.0  | 31.93% | 7164.0  | 27.94% | <a href="#">motif file (matrix)</a> | <a href="#">pdf</a> |  |
| 40 |  | TATA-Box (TBP)/Promoter/Homer                     | 1e-50 | -1.152e+02 | 0.0000 | 17445.0 | 59.28% | 14092.5 | 54.96% | <a href="#">motif file (matrix)</a> | <a href="#">pdf</a> |  |
| 41 |  | VDR(NR/DR3)/GM10855-VDR+vitD-ChIP-Seq/Homer       | 1e-49 | -1.137e+02 | 0.0000 | 4527.0  | 15.38% | 3189.5  | 12.44% | <a href="#">motif file (matrix)</a> | <a href="#">pdf</a> |  |
| 42 |  | BORIS(Zf)/K562-CTCF-ChIP-Seq/Homer                | 1e-43 | -1.006e+02 | 0.0000 | 5897.0  | 20.04% | 4339.6  | 16.92% | <a href="#">motif file (matrix)</a> | <a href="#">pdf</a> |  |
| 43 |  | TEAD(TEA)/Fibroblast-PU.1-ChIP-Seq/Homer          | 1e-42 | -9.810e+01 | 0.0000 | 10819.0 | 36.76% | 8451.5  | 32.96% | <a href="#">motif file (matrix)</a> | <a href="#">pdf</a> |  |
| 44 |  | STAT4(Stat)/CD4-Stat4-ChIP-Seq/Homer              | 1e-42 | -9.744e+01 | 0.0000 | 14043.0 | 47.72% | 11216.4 | 43.74% | <a href="#">motif file (matrix)</a> | <a href="#">pdf</a> |  |
| 45 |  | Sox2(HMG)/mES-Sox2-ChIP-Seq/Homer                 | 1e-42 | -9.710e+01 | 0.0000 | 12449.0 | 42.30% | 9846.0  | 38.40% | <a href="#">motif file (matrix)</a> | <a href="#">pdf</a> |  |
| 46 |  | FOXA1(Forkhead)/LNCAP-FOXA1-ChIP-Seq/Homer        | 1e-41 | -9.491e+01 | 0.0000 | 15854.0 | 53.87% | 12803.4 | 49.93% | <a href="#">motif file (matrix)</a> | <a href="#">pdf</a> |  |
| 47 |  | Lhx3(Homeobox)/Forebrain-p300-ChIP-Seq/Homer      | 1e-40 | -9.417e+01 | 0.0000 | 13857.0 | 47.09% | 11073.6 | 43.19% | <a href="#">motif file (matrix)</a> | <a href="#">pdf</a> |  |
| 48 |  | PU.1-IRF/Bcell-PU.1-ChIP-Seq/Homer                | 1e-39 | -9.072e+01 | 0.0000 | 19245.0 | 65.40% | 15814.4 | 61.68% | <a href="#">motif file (matrix)</a> | <a href="#">pdf</a> |  |
| 49 |  | STAT5 (Stat)/mCD4+-Stat5a b-ChIP-Seq/Homer        | 1e-38 | -8.832e+01 | 0.0000 | 5796.0  | 19.70% | 4306.2  | 16.79% | <a href="#">motif file (matrix)</a> | <a href="#">pdf</a> |  |
| 50 |  | Tbox:Smad/EScd5-Smad2_3-ChIP-Seq (GSE29422)/Homer | 1e-37 | -8.683e+01 | 0.0000 | 3735.0  | 12.69% | 2648.2  | 10.33% | <a href="#">motif file (matrix)</a> | <a href="#">pdf</a> |  |

|    |                                                                                     |                                                       |       |            |        |         |        |         |        |                                     |                     |  |
|----|-------------------------------------------------------------------------------------|-------------------------------------------------------|-------|------------|--------|---------|--------|---------|--------|-------------------------------------|---------------------|--|
|    |    |                                                       |       |            |        |         |        |         |        |                                     |                     |  |
| 51 |    | Smad4(MAD)/ESC-SMAD4-ChIP-Seq(GSE29422)/Homer         | 1e-37 | -8.630e+01 | 0.0000 | 21122.0 | 71.78% | 17517.9 | 68.32% | <a href="#">motif file (matrix)</a> | <a href="#">pdf</a> |  |
| 52 |    | CEBP:AP1/ThioMac-CEBPb-ChIP-Seq/Homer                 | 1e-37 | -8.536e+01 | 0.0000 | 10716.0 | 36.41% | 8430.0  | 32.88% | <a href="#">motif file (matrix)</a> | <a href="#">pdf</a> |  |
| 53 |    | TEAD4(TEA)/Tropoblast-Tead4-ChIP-Seq (GSE37350)/Homer | 1e-35 | -8.276e+01 | 0.0000 | 13624.0 | 46.30% | 10936.9 | 42.65% | <a href="#">motif file (matrix)</a> | <a href="#">pdf</a> |  |
| 54 |    | Nanog(Homeobox)/mES-Nanog-ChIP-Seq/Homer              | 1e-35 | -8.133e+01 | 0.0000 | 28165.0 | 95.71% | 24119.7 | 94.07% | <a href="#">motif file (matrix)</a> | <a href="#">pdf</a> |  |
| 55 |    | Oct2(POU)/Homeobox/Bcell-Oct2-ChIP-Seq/Homer          | 1e-35 | -8.083e+01 | 0.0000 | 5345.0  | 18.16% | 3969.8  | 15.48% | <a href="#">motif file (matrix)</a> | <a href="#">pdf</a> |  |
| 56 |    | FOXA1(Forkhead)/MCF7-FOXA1-ChIP-Seq/Homer             | 1e-33 | -7.633e+01 | 0.0000 | 14151.0 | 48.09% | 11430.9 | 44.58% | <a href="#">motif file (matrix)</a> | <a href="#">pdf</a> |  |
| 57 |    | Gata4(Zf)/Heart-Gata4-ChIP-Seq(GSE35151)/Homer        | 1e-33 | -7.606e+01 | 0.0000 | 13432.0 | 45.64% | 10810.3 | 42.16% | <a href="#">motif file (matrix)</a> | <a href="#">pdf</a> |  |
| 58 |    | EBF(EBF)/proBcell-EBF-ChIP-Seq/Homer                  | 1e-32 | -7.411e+01 | 0.0000 | 5434.0  | 18.47% | 4071.6  | 15.88% | <a href="#">motif file (matrix)</a> | <a href="#">pdf</a> |  |
| 59 |  | Smad2(MAD)/ES-SMAD2-ChIP-Seq(GSE29422)/Homer          | 1e-32 | -7.385e+01 | 0.0000 | 20891.0 | 70.99% | 17380.2 | 67.78% | <a href="#">motif file (matrix)</a> | <a href="#">pdf</a> |  |
| 60 |  | Stat3+il23(Stat)/CD4-Stat3-ChIP-Seq/Homer             | 1e-31 | -7.211e+01 | 0.0000 | 11590.0 | 39.38% | 9251.2  | 36.08% | <a href="#">motif file (matrix)</a> | <a href="#">pdf</a> |  |
| 61 |  | STAT1(Stat)/HelaS3-STAT1-ChIP-Seq/Homer               | 1e-31 | -7.160e+01 | 0.0000 | 5203.0  | 17.68% | 3893.2  | 15.18% | <a href="#">motif file (matrix)</a> | <a href="#">pdf</a> |  |
| 62 |  | Sox6(HMG)/Myotubes-Sox6-ChIP-Seq(GSE32627)/Homer      | 1e-30 | -7.019e+01 | 0.0000 | 18650.0 | 63.38% | 15408.0 | 60.09% | <a href="#">motif file (matrix)</a> | <a href="#">pdf</a> |  |
| 63 |                                                                                     | Foxo1(Forkhead)/RAW-Foxo1-ChIP-Seq/Homer              | 1e-30 | -7.004e+01 | 0.0000 | 21812.0 | 74.12% | 18230.9 | 71.10% | <a href="#">motif file (matrix)</a> | <a href="#">pdf</a> |  |

|    |                                                                                     |                                                    |       |            |        |         |        |         |        |                                     |                     |  |
|----|-------------------------------------------------------------------------------------|----------------------------------------------------|-------|------------|--------|---------|--------|---------|--------|-------------------------------------|---------------------|--|
|    |    |                                                    |       |            |        |         |        |         |        |                                     |                     |  |
| 64 |    | NRF1(NRF)/MCF7-NRF1-ChIP-Seq/Homer                 | 1e-30 | -6.934e+01 | 0.0000 | 3859.0  | 13.11% | 2811.6  | 10.97% | <a href="#">motif file (matrix)</a> | <a href="#">pdf</a> |  |
| 65 |    | E2F(E2F)/Cell-Cycle-Exp/Homer                      | 1e-28 | -6.637e+01 | 0.0000 | 1590.0  | 5.40%  | 1038.9  | 4.05%  | <a href="#">motif file (matrix)</a> | <a href="#">pdf</a> |  |
| 66 |    | SCL/HPC7-Sci-ChIP-Seq/Homer                        | 1e-27 | -6.430e+01 | 0.0000 | 28763.0 | 97.74% | 24780.1 | 96.64% | <a href="#">motif file (matrix)</a> | <a href="#">pdf</a> |  |
| 67 |    | GATA3(Zf)/iTreg-Gata3-ChIP-Seq(GSE20898)/Homer     | 1e-27 | -6.351e+01 | 0.0000 | 17885.0 | 60.78% | 14775.4 | 57.62% | <a href="#">motif file (matrix)</a> | <a href="#">pdf</a> |  |
| 68 |    | EGR(Zf)/K562-EGR1-ChIP-Seq/Homer                   | 1e-27 | -6.241e+01 | 0.0000 | 6032.0  | 20.50% | 4620.3  | 18.02% | <a href="#">motif file (matrix)</a> | <a href="#">pdf</a> |  |
| 69 |    | PRDM1/BMI1(Zf)/Hela-PRDM1-ChIP-Seq(GSE31477)/Homer | 1e-26 | -6.129e+01 | 0.0000 | 9328.0  | 31.70% | 7391.3  | 28.83% | <a href="#">motif file (matrix)</a> | <a href="#">pdf</a> |  |
| 70 |    | Gata1(Zf)/K562-GATA1-ChIP-Seq/Homer                | 1e-25 | -5.949e+01 | 0.0000 | 8447.0  | 28.70% | 6657.4  | 25.96% | <a href="#">motif file (matrix)</a> | <a href="#">pdf</a> |  |
| 71 |    | AR-halfsite(NR)/LNCaP-AR-ChIP-Seq/Homer            | 1e-25 | -5.925e+01 | 0.0000 | 27990.0 | 95.11% | 24016.3 | 93.66% | <a href="#">motif file (matrix)</a> | <a href="#">pdf</a> |  |
| 72 |  | E2F1(E2F)/Hela-E2F1-ChIP-Seq/Hoemr                 | 1e-24 | -5.620e+01 | 0.0000 | 7460.0  | 25.35% | 5846.5  | 22.80% | <a href="#">motif file (matrix)</a> | <a href="#">pdf</a> |  |
| 73 |  | PU.1(ETS)/ThioMac-PU.1-ChIP-Seq/Homer              | 1e-24 | -5.572e+01 | 0.0000 | 8320.0  | 28.27% | 6573.4  | 25.64% | <a href="#">motif file (matrix)</a> | <a href="#">pdf</a> |  |
| 74 |  | Gata2(Zf)/K562-GATA2-ChIP-Seq/Homer                | 1e-22 | -5.236e+01 | 0.0000 | 9318.0  | 31.66% | 7441.0  | 29.02% | <a href="#">motif file (matrix)</a> | <a href="#">pdf</a> |  |
| 75 |  | NRF1/Promoter/Homer                                | 1e-21 | -5.062e+01 | 0.0000 | 4034.0  | 13.71% | 3034.7  | 11.84% | <a href="#">motif file (matrix)</a> | <a href="#">pdf</a> |  |
| 76 |                                                                                     | HOXA9/HSC-Hoxa9-ChIP-Seq(GSE33509)/Homer           | 1e-20 | -4.678e+01 | 0.0000 | 9275.0  | 31.52% | 7442.9  | 29.03% | <a href="#">motif file (matrix)</a> | <a href="#">pdf</a> |  |

|    |                                                                                     |                                               |       |            |        |         |        |         |        |                                     |                     |  |
|----|-------------------------------------------------------------------------------------|-----------------------------------------------|-------|------------|--------|---------|--------|---------|--------|-------------------------------------|---------------------|--|
|    |    |                                               |       |            |        |         |        |         |        |                                     |                     |  |
| 77 |    | Pdx1(Homeobox)/Islet-Pdx1-ChIP-Seq/Homer      | 1e-19 | -4.604e+01 | 0.0000 | 11941.0 | 40.58% | 9729.8  | 37.95% | <a href="#">motif file (matrix)</a> | <a href="#">pdf</a> |  |
| 78 |    | Ets1-distal(ETS)/CD4+-PoIII-ChIP-Seq/Homer    | 1e-18 | -4.239e+01 | 0.0000 | 4689.0  | 15.93% | 3616.4  | 14.10% | <a href="#">motif file (matrix)</a> | <a href="#">pdf</a> |  |
| 79 |    | ZFX(Zf)/mES-Zfx-ChIP-Seq/Homer                | 1e-17 | -4.118e+01 | 0.0000 | 19682.0 | 66.88% | 16528.0 | 64.46% | <a href="#">motif file (matrix)</a> | <a href="#">pdf</a> |  |
| 80 |    | IRF4(IRF)/GM12878-IRF4-ChIP-Seq/Homer         | 1e-16 | -3.846e+01 | 0.0000 | 6995.0  | 23.77% | 5570.8  | 21.73% | <a href="#">motif file (matrix)</a> | <a href="#">pdf</a> |  |
| 81 |    | PR(NR)/T47D-PR-ChIP-Seq(GSE31130)/Homer       | 1e-16 | -3.761e+01 | 0.0000 | 22526.0 | 76.55% | 19089.3 | 74.45% | <a href="#">motif file (matrix)</a> | <a href="#">pdf</a> |  |
| 82 |    | Hoxc9/Ainv15-Hoxc9-ChIP-Seq/Homer             | 1e-15 | -3.679e+01 | 0.0000 | 7526.0  | 25.57% | 6031.4  | 23.52% | <a href="#">motif file (matrix)</a> | <a href="#">pdf</a> |  |
| 83 |    | RFX(HTH)/K562-RFX3-ChIP-Seq/Homer             | 1e-15 | -3.577e+01 | 0.0000 | 1654.0  | 5.62%  | 1179.8  | 4.60%  | <a href="#">motif file (matrix)</a> | <a href="#">pdf</a> |  |
| 84 |    | Nur77(NR)/K562-NR4A1-ChIP-Seq(GSE31363)/Homer | 1e-15 | -3.474e+01 | 0.0000 | 2810.0  | 9.55%  | 2113.6  | 8.24%  | <a href="#">motif file (matrix)</a> | <a href="#">pdf</a> |  |
| 85 |   | NFkB-p65-Rel(RHD)/LPS-exp/Homer               | 1e-14 | -3.448e+01 | 0.0000 | 1260.0  | 4.28%  | 874.5   | 3.41%  | <a href="#">motif file (matrix)</a> | <a href="#">pdf</a> |  |
| 86 |  | Eomes(T-box)/H9-Eomes-ChIP-Seq/Homer          | 1e-14 | -3.380e+01 | 0.0000 | 26960.0 | 91.61% | 23149.0 | 90.28% | <a href="#">motif file (matrix)</a> | <a href="#">pdf</a> |  |
| 87 |  | Tcf12(HLH)/GM12878-Tcf12-ChIP-Seq/Homer       | 1e-14 | -3.358e+01 | 0.0000 | 15282.0 | 51.93% | 12730.4 | 49.65% | <a href="#">motif file (matrix)</a> | <a href="#">pdf</a> |  |
| 88 |  | RXR(NR/DR1)/3T3L1-RXR-ChIP-Seq/Homer          | 1e-13 | -3.179e+01 | 0.0000 | 17352.0 | 58.96% | 14557.7 | 56.78% | <a href="#">motif file (matrix)</a> | <a href="#">pdf</a> |  |
| 89 |                                                                                     | PRDM14(Zf)/H1-PRDM14-ChIP-Seq/Homer           | 1e-13 | -3.150e+01 | 0.0000 | 5129.0  | 17.43% | 4051.3  | 15.80% | <a href="#">motif file (matrix)</a> | <a href="#">pdf</a> |  |



|     |                                                                                     |                                                         |       |            |        |         |        |         |        |                                     |                     |  |
|-----|-------------------------------------------------------------------------------------|---------------------------------------------------------|-------|------------|--------|---------|--------|---------|--------|-------------------------------------|---------------------|--|
|     |    |                                                         |       |            |        |         |        |         |        |                                     |                     |  |
| 90  |    | Unknown/Homeobox/Limb-p300-ChIP-Seq/Homer               | 1e-12 | -2.931e+01 | 0.0000 | 10037.0 | 34.11% | 8235.4  | 32.12% | <a href="#">motif file (matrix)</a> | <a href="#">pdf</a> |  |
| 91  |    | PPARE(NR/DR1)/3T3L1-Pparg-ChIP-Seq/Homer                | 1e-12 | -2.878e+01 | 0.0000 | 15173.0 | 51.56% | 12682.4 | 49.46% | <a href="#">motif file (matrix)</a> | <a href="#">pdf</a> |  |
| 92  |    | Foxh1(Forkhead)/hESC-FOXH1-ChIP-Seq (GSE29422)/Homer    | 1e-12 | -2.816e+01 | 0.0000 | 9142.0  | 31.07% | 7479.5  | 29.17% | <a href="#">motif file (matrix)</a> | <a href="#">pdf</a> |  |
| 93  |    | MyoG(HLH)/C2C12-MyoG-ChIP-Seq(GSE36024)/Homer           | 1e-11 | -2.691e+01 | 0.0000 | 15873.0 | 53.94% | 13312.9 | 51.92% | <a href="#">motif file (matrix)</a> | <a href="#">pdf</a> |  |
| 94  |    | Tcf3(HMG)/mES-Tcf3-ChIP-Seq/Homer                       | 1e-11 | -2.657e+01 | 0.0000 | 3751.0  | 12.75% | 2935.1  | 11.45% | <a href="#">motif file (matrix)</a> | <a href="#">pdf</a> |  |
| 95  |    | HIF1b(HLH)/O785-HIF1b-ChIP-Seq(GSE34871)/Homer          | 1e-11 | -2.548e+01 | 0.0000 | 7605.0  | 25.84% | 6192.9  | 24.15% | <a href="#">motif file (matrix)</a> | <a href="#">pdf</a> |  |
| 96  |    | X-box(HTH)/NPC-H3K4me1-ChIP-Seq/Homer                   | 1e-11 | -2.547e+01 | 0.0000 | 1803.0  | 6.13%  | 1341.6  | 5.23%  | <a href="#">motif file (matrix)</a> | <a href="#">pdf</a> |  |
| 97  |    | GFY(?)/Promoter/Homer                                   | 1e-10 | -2.477e+01 | 0.0000 | 1562.0  | 5.31%  | 1150.1  | 4.49%  | <a href="#">motif file (matrix)</a> | <a href="#">pdf</a> |  |
| 98  |  | MyoD(HLH)/Myotube-MyoD-ChIP-Seq/Homer                   | 1e-9  | -2.198e+01 | 0.0000 | 12652.0 | 42.99% | 10566.4 | 41.21% | <a href="#">motif file (matrix)</a> | <a href="#">pdf</a> |  |
| 99  |  | NF-E2(bZIP)/K562-NFE2-ChIP-Seq/Homer                    | 1e-9  | -2.190e+01 | 0.0000 | 799.0   | 2.72%  | 556.3   | 2.17%  | <a href="#">motif file (matrix)</a> | <a href="#">pdf</a> |  |
| 100 |  | Six1(Homeobox)/Myoblast-Six1-ChIP-Chip (GSE20150)/Homer | 1e-9  | -2.151e+01 | 0.0000 | 3902.0  | 13.26% | 3097.6  | 12.08% | <a href="#">motif file (matrix)</a> | <a href="#">pdf</a> |  |
| 101 |  | Hoxb4/ES-Hoxb4-ChIP-Seq (GSE34014)/Homer                | 1e-8  | -2.028e+01 | 0.0000 | 2693.0  | 9.15%  | 2099.2  | 8.19%  | <a href="#">motif file (matrix)</a> | <a href="#">pdf</a> |  |
| 102 |                                                                                     | HIF2a(HLH)/O785-HIF2a-ChIP-Seq(GSE34871)/Homer          | 1e-8  | -1.999e+01 | 0.0000 | 7006.0  | 23.81% | 5735.9  | 22.37% | <a href="#">motif file (matrix)</a> | <a href="#">pdf</a> |  |

|     |                                                                                      |                                                      |      |            |        |         |        |         |        |                                     |                     |  |
|-----|--------------------------------------------------------------------------------------|------------------------------------------------------|------|------------|--------|---------|--------|---------|--------|-------------------------------------|---------------------|--|
|     |     |                                                      |      |            |        |         |        |         |        |                                     |                     |  |
| 103 |     | HNF6(Homeobox)/Liver-Hnf6-ChIP-Seq(ERP000394)        | 1e-7 | -1.840e+01 | 0.0000 | 7710.0  | 26.20% | 6353.6  | 24.78% | <a href="#">motif file (matrix)</a> | <a href="#">pdf</a> |  |
| 104 |     | Smad3(MAD)/NPC-Smad3-ChIP-Seq(GSE36673)/Homer        | 1e-7 | -1.814e+01 | 0.0000 | 26159.0 | 88.89% | 22523.9 | 87.84% | <a href="#">motif file (matrix)</a> | <a href="#">pdf</a> |  |
| 105 |     | MafA(bZIP)/Islet-MafA-ChIP-Seq(GSE30298)/Homer       | 1e-7 | -1.748e+01 | 0.0000 | 10730.0 | 36.46% | 8959.8  | 34.94% | <a href="#">motif file (matrix)</a> | <a href="#">pdf</a> |  |
| 106 |    | NFAT:AP1/Jurkat-NFATC1-ChIP-Seq/Homer                | 1e-7 | -1.727e+01 | 0.0000 | 2986.0  | 10.15% | 2364.7  | 9.22%  | <a href="#">motif file (matrix)</a> | <a href="#">pdf</a> |  |
| 107 |     | ISRE(IRF)/ThioMac-LPS-exp/HOMER                      | 1e-7 | -1.685e+01 | 0.0000 | 1185.0  | 4.03%  | 883.4   | 3.45%  | <a href="#">motif file (matrix)</a> | <a href="#">pdf</a> |  |
| 108 |     | TCFL2(HMG)/K562-TCF7L2-ChIP-Seq(GSE29196)/Homer      | 1e-7 | -1.671e+01 | 0.0000 | 1173.0  | 3.99%  | 874.0   | 3.41%  | <a href="#">motif file (matrix)</a> | <a href="#">pdf</a> |  |
| 109 |     | AP-1(bZIP)/ThioMac-PU.1-ChIP-Seq/Homer               | 1e-7 | -1.636e+01 | 0.0000 | 9251.0  | 31.44% | 7699.9  | 30.03% | <a href="#">motif file (matrix)</a> | <a href="#">pdf</a> |  |
| 110 |     | Rfx1(HTH)/NPC-Rfx1-ChIP-Seq/Homer                    | 1e-6 | -1.597e+01 | 0.0000 | 3493.0  | 11.87% | 2799.3  | 10.92% | <a href="#">motif file (matrix)</a> | <a href="#">pdf</a> |  |
| 111 |   | Nrf2(bZIP)/Lymphoblast-Nrf2-ChIP-Seq(GSE37589)/Homer | 1e-6 | -1.546e+01 | 0.0000 | 686.0   | 2.33%  | 490.4   | 1.91%  | <a href="#">motif file (matrix)</a> | <a href="#">pdf</a> |  |
| 112 |  | Tcfcp2l1(CP2)/mES-Tcfcp2l1-ChIP-Seq/Homer            | 1e-6 | -1.534e+01 | 0.0000 | 2491.0  | 8.46%  | 1966.2  | 7.67%  | <a href="#">motif file (matrix)</a> | <a href="#">pdf</a> |  |
| 113 |  | GATA:SCL/Ter119-SCL-ChIP-Seq/Homer                   | 1e-6 | -1.420e+01 | 0.0000 | 1915.0  | 6.51%  | 1496.9  | 5.84%  | <a href="#">motif file (matrix)</a> | <a href="#">pdf</a> |  |
| 114 |   | Bach1(bZIP)/K562-Bach1-ChIP-Seq(GSE31477)/Homer      | 1e-6 | -1.404e+01 | 0.0000 | 703.0   | 2.39%  | 509.1   | 1.99%  | <a href="#">motif file (matrix)</a> | <a href="#">pdf</a> |  |
| 115 |                                                                                      | T1ISRE(IRF)/Ifnb-Exp/Homer                           | 1e-5 | -1.300e+01 | 0.0000 | 221.0   | 0.75%  | 139.4   | 0.54%  | <a href="#">motif file (matrix)</a> | <a href="#">pdf</a> |  |

|     |                                                                                     |                                                   |      |            |        |         |        |         |        |                                     |                     |  |  |
|-----|-------------------------------------------------------------------------------------|---------------------------------------------------|------|------------|--------|---------|--------|---------|--------|-------------------------------------|---------------------|--|--|
|     |    |                                                   |      |            |        |         |        |         |        |                                     |                     |  |  |
| 116 |    | NF1:FOXA1/LNCAP-FOXA1-ChIP-Seq/Homer              | 1e-5 | -1.294e+01 | 0.0000 | 771.0   | 2.62%  | 568.9   | 2.22%  | <a href="#">motif file (matrix)</a> | <a href="#">pdf</a> |  |  |
| 117 |    | Tcf4(HMG)/Hct116-Tcf4-ChIP-Seq/Homer              | 1e-5 | -1.270e+01 | 0.0000 | 6451.0  | 21.92% | 5344.5  | 20.84% | <a href="#">motif file (matrix)</a> | <a href="#">pdf</a> |  |  |
| 118 |    | E2F7(E2F)/Hela-E2F7-ChIP-Seq(GSE32673)/Homer      | 1e-5 | -1.234e+01 | 0.0000 | 3806.0  | 12.93% | 3097.5  | 12.08% | <a href="#">motif file (matrix)</a> | <a href="#">pdf</a> |  |  |
| 119 |    | GATA-IR4(Zf)/iTreg-Gata3-ChIP-Seq(GSE20898)/Homer | 1e-5 | -1.192e+01 | 0.0000 | 1104.0  | 3.75%  | 844.0   | 3.29%  | <a href="#">motif file (matrix)</a> | <a href="#">pdf</a> |  |  |
| 120 |    | CRX(Homeobox)/Retina-Crx-ChIP-Seq/Homer           | 1e-4 | -1.104e+01 | 0.0000 | 24796.0 | 84.26% | 21374.2 | 83.36% | <a href="#">motif file (matrix)</a> | <a href="#">pdf</a> |  |  |
| 121 |    | Myf5(bHLH)/GM-Myf5-ChIP-Seq(GSE24852)/Homer       | 1e-4 | -1.078e+01 | 0.0000 | 10923.0 | 37.12% | 9222.2  | 35.97% | <a href="#">motif file (matrix)</a> | <a href="#">pdf</a> |  |  |
| 122 |    | Cdx2(Homeobox)/mES-Cdx2-ChIP-Seq/Homer            | 1e-4 | -9.755e+00 | 0.0001 | 10162.0 | 34.53% | 8582.0  | 33.47% | <a href="#">motif file (matrix)</a> | <a href="#">pdf</a> |  |  |
| 123 |    | HOXA2(Homeobox)/mES-Hoxa2-ChIP-Seq/Homer          | 1e-3 | -9.170e+00 | 0.0002 | 1377.0  | 4.68%  | 1086.5  | 4.24%  | <a href="#">motif file (matrix)</a> | <a href="#">pdf</a> |  |  |
| 124 |  | RUNX2(Runt)/PCa-RUNX2-ChIP-Seq(GSE33889)/Homer    | 1e-3 | -8.475e+00 | 0.0004 | 11288.0 | 38.36% | 9579.9  | 37.36% | <a href="#">motif file (matrix)</a> | <a href="#">pdf</a> |  |  |
| 125 |  | NFY (CCAAT)/Promoter/Homer                        | 1e-3 | -8.108e+00 | 0.0005 | 11116.0 | 37.77% | 9437.6  | 36.81% | <a href="#">motif file (matrix)</a> | <a href="#">pdf</a> |  |  |
| 126 |  | NFkB-p50,p52(RHD)/p50-ChIP-Chip/Homer             | 1e-3 | -6.954e+00 | 0.0016 | 3244.0  | 11.02% | 2683.8  | 10.47% | <a href="#">motif file (matrix)</a> | <a href="#">pdf</a> |  |  |
| 127 |  | Jun-AP1(bZIP)/K562-cJun-ChIP-Seq/Homer            | 1e-2 | -6.832e+00 | 0.0018 | 3134.0  | 10.65% | 2591.0  | 10.11% | <a href="#">motif file (matrix)</a> | <a href="#">pdf</a> |  |  |
| 128 |                                                                                     | CArG(MADS)/PUER-Srf-ChIP-Seq/Homer                | 1e-2 | -6.639e+00 | 0.0022 | 4649.0  | 15.80% | 3888.3  | 15.16% | <a href="#">motif file (matrix)</a> | <a href="#">pdf</a> |  |  |

|     |                                                                                      |                                                   |      |            |        |         |        |         |        |                                     |                     |  |  |
|-----|--------------------------------------------------------------------------------------|---------------------------------------------------|------|------------|--------|---------|--------|---------|--------|-------------------------------------|---------------------|--|--|
|     |     |                                                   |      |            |        |         |        |         |        |                                     |                     |  |  |
| 129 |     | Hnf1(Homeobox)/Liver-Foxa2-ChIP-Seq/Homer         | 1e-2 | -6.536e+00 | 0.0024 | 2427.0  | 8.25%  | 1994.6  | 7.78%  | <a href="#">motif file (matrix)</a> | <a href="#">pdf</a> |  |  |
| 130 |     | RUNX-AML (Runt)/CD4+-PolIII-ChIP-Seq/Homer        | 1e-2 | -6.446e+00 | 0.0026 | 10167.0 | 34.55% | 8649.0  | 33.73% | <a href="#">motif file (matrix)</a> | <a href="#">pdf</a> |  |  |
| 131 |     | HNF4a(NR/DR1)/HepG2-HNF4a-ChIP-Seq/Homer          | 1e-2 | -5.984e+00 | 0.0041 | 7257.0  | 24.66% | 6143.9  | 23.96% | <a href="#">motif file (matrix)</a> | <a href="#">pdf</a> |  |  |
| 132 |     | JunD(bZIP)/K562-JunD-ChIP-Seq/Homer               | 1e-2 | -5.894e+00 | 0.0045 | 1183.0  | 4.02%  | 951.4   | 3.71%  | <a href="#">motif file (matrix)</a> | <a href="#">pdf</a> |  |  |
| 133 |     | PRDM9(Zf)/Testis-DMC1-ChIP-Seq(GSE35498)/Homer    | 1e-2 | -5.719e+00 | 0.0053 | 6911.0  | 23.48% | 5850.1  | 22.82% | <a href="#">motif file (matrix)</a> | <a href="#">pdf</a> |  |  |
| 134 |    | p53(p53)/p53-ChIP-ChIP/Homer                      | 1e-2 | -5.446e+00 | 0.0069 | 121.0   | 0.41%  | 82.1    | 0.32%  | <a href="#">motif file (matrix)</a> | <a href="#">pdf</a> |  |  |
| 135 |     | Tbx20(T-box)/Heart-Tbx20-ChIP-Seq(GSE29636)/Homer | 1e-2 | -5.409e+00 | 0.0071 | 3198.0  | 10.87% | 2666.4  | 10.40% | <a href="#">motif file (matrix)</a> | <a href="#">pdf</a> |  |  |
| 136 |     | E-box(HLH)/Promoter/Homer                         | 1e-2 | -5.369e+00 | 0.0074 | 1493.0  | 5.07%  | 1217.8  | 4.75%  | <a href="#">motif file (matrix)</a> | <a href="#">pdf</a> |  |  |
| 137 |   | ETS:E-box/HPC7-Scl-ChIP-Seq/Homer                 | 1e-2 | -5.017e+00 | 0.0104 | 1583.0  | 5.38%  | 1297.3  | 5.06%  | <a href="#">motif file (matrix)</a> | <a href="#">pdf</a> |  |  |
| 138 |   | ATF3(bZIP)/K562-ATF3-ChIP-Seq/Homer               | 1e-2 | -4.912e+00 | 0.0115 | 3073.0  | 10.44% | 2567.4  | 10.01% | <a href="#">motif file (matrix)</a> | <a href="#">pdf</a> |  |  |
| 139 |  | HRE(HSF)/HepG2-HSF1-ChIP-Seq/Homer                | 1e-2 | -4.878e+00 | 0.0118 | 2474.0  | 8.41%  | 2056.8  | 8.02%  | <a href="#">motif file (matrix)</a> | <a href="#">pdf</a> |  |  |
| 140 |   | RUNX1(Runt)/Jurkat-RUNX1-ChIP-Seq/Homer           | 1e-2 | -4.799e+00 | 0.0127 | 13503.0 | 45.88% | 11586.9 | 45.19% | <a href="#">motif file (matrix)</a> | <a href="#">pdf</a> |  |  |

## **Results homer motif enrichments (known motifs)**

TCam-2 h3k27ac

## Homer Known Motif Enrichment Results

[Homer de novo Motif Results](#)

[Gene Ontology Enrichment Results](#)

[Known Motif Enrichment Results \(txt file\)](#)

Total Target Sequences = 41569, Total Background Sequences = 39569

| Rank | Motif                                                                               | Name                                          | P-value | log P-pvalue | q-value (Benjamini) | # Target Sequences with Motif | % of Targets Sequences with Motif | # Background Sequences with Motif | % of Background Sequences with Motif | Motif File                          | PDF                 |
|------|-------------------------------------------------------------------------------------|-----------------------------------------------|---------|--------------|---------------------|-------------------------------|-----------------------------------|-----------------------------------|--------------------------------------|-------------------------------------|---------------------|
| 1    |    | Maz(Zf)/HepG2-Maz-ChIP-Seq (GSE31477)/Homer   | 1e-275  | -6.346e+02   | 0.0000              | 27868.0                       | 67.04%                            | 23175.4                           | 58.57%                               | <a href="#">motif file (matrix)</a> | <a href="#">pdf</a> |
| 2    |    | EBF1(EBF)/Near-E2A-ChIP-Seq/Homer             | 1e-234  | -5.391e+02   | 0.0000              | 25935.0                       | 62.39%                            | 21547.2                           | 54.46%                               | <a href="#">motif file (matrix)</a> | <a href="#">pdf</a> |
| 3    |    | AP2gamma(AP2)/MCF7-TFAP2c-ChIP-Seq/Homer      | 1e-224  | -5.179e+02   | 0.0000              | 23712.0                       | 57.04%                            | 19464.1                           | 49.19%                               | <a href="#">motif file (matrix)</a> | <a href="#">pdf</a> |
| 4    |    | AP-2alpha(AP2)/Hela-AP2alpha-ChIP-Seq/Homer   | 1e-224  | -5.179e+02   | 0.0000              | 22943.0                       | 55.19%                            | 18730.6                           | 47.34%                               | <a href="#">motif file (matrix)</a> | <a href="#">pdf</a> |
| 5    |    | Fli1(ETS)/CD8-FLI-ChIP-Seq (GSE20898)/Homer   | 1e-222  | -5.126e+02   | 0.0000              | 24983.0                       | 60.10%                            | 20703.1                           | 52.32%                               | <a href="#">motif file (matrix)</a> | <a href="#">pdf</a> |
| 6    |    | Sox2(HMG)/mES-Sox2-ChIP-Seq/Homer             | 1e-182  | -4.210e+02   | 0.0000              | 20355.0                       | 48.97%                            | 16593.5                           | 41.94%                               | <a href="#">motif file (matrix)</a> | <a href="#">pdf</a> |
| 7    |  | Sox3(HMG)/NPC-Sox3-ChIP-Seq(GSE33059)/Homer   | 1e-171  | -3.960e+02   | 0.0000              | 30831.0                       | 74.17%                            | 26858.1                           | 67.88%                               | <a href="#">motif file (matrix)</a> | <a href="#">pdf</a> |
| 8    |  | Elk4(ETS)/Hela-Elk4-ChIP-Seq (GSE31477)/Homer | 1e-171  | -3.939e+02   | 0.0000              | 14373.0                       | 34.58%                            | 11191.8                           | 28.29%                               | <a href="#">motif file (matrix)</a> | <a href="#">pdf</a> |
| 9    |  | ERG(ETS)/VCaP-ERG-ChIP-Seq/Homer              | 1e-165  | -3.820e+02   | 0.0000              | 31046.0                       | 74.69%                            | 27122.3                           | 68.55%                               | <a href="#">motif file (matrix)</a> | <a href="#">pdf</a> |
| 10   |  | GABPA(ETS)/Jurkat-GABPa-ChIP-Seq/Homer        | 1e-163  | -3.755e+02   | 0.0000              | 21184.0                       | 50.96%                            | 17527.9                           | 44.30%                               | <a href="#">motif file (matrix)</a> | <a href="#">pdf</a> |
| 11   |                                                                                     | ETV1(ETS)/GIST48-ETV1-ChIP-Seq/Homer          | 1e-158  | -3.640e+02   | 0.0000              | 28252.0                       | 67.96%                            | 24390.6                           | 61.64%                               | <a href="#">motif file (matrix)</a> | <a href="#">pdf</a> |

|    |                                                                                     |                                                            |        |            |        |         |        |         |        |                                     |                     |  |
|----|-------------------------------------------------------------------------------------|------------------------------------------------------------|--------|------------|--------|---------|--------|---------|--------|-------------------------------------|---------------------|--|
|    |    |                                                            |        |            |        |         |        |         |        |                                     |                     |  |
| 12 |    | Elk1(ETS)/Hela-Elk1-ChIP-Seq (GSE31477)/Homer              | 1e-156 | -3.595e+02 | 0.0000 | 14292.0 | 34.38% | 11226.3 | 28.37% | <a href="#">motif file (matrix)</a> | <a href="#">pdf</a> |  |
| 13 |    | ETS1(ETS)/Jurkat-ETS1-ChIP-Seq/Homer                       | 1e-147 | -3.397e+02 | 0.0000 | 23618.0 | 56.82% | 19971.2 | 50.47% | <a href="#">motif file (matrix)</a> | <a href="#">pdf</a> |  |
| 14 |    | BMXB(HTH)/Hela-BMVB-ChIPSeq(GSE27030)/Homer                | 1e-145 | -3.349e+02 | 0.0000 | 28066.0 | 67.52% | 24312.5 | 61.45% | <a href="#">motif file (matrix)</a> | <a href="#">pdf</a> |  |
| 15 |    | Sox6(HMG)/Myotubes-Sox6-ChIP-Seq(GSE32627)/Homer           | 1e-136 | -3.144e+02 | 0.0000 | 29421.0 | 70.78% | 25731.1 | 65.03% | <a href="#">motif file (matrix)</a> | <a href="#">pdf</a> |  |
| 16 |    | Bcl6(Zf)/Liver-Bcl6-ChIP-Seq (GSE31578)/Homer              | 1e-131 | -3.030e+02 | 0.0000 | 28213.0 | 67.87% | 24578.9 | 62.12% | <a href="#">motif file (matrix)</a> | <a href="#">pdf</a> |  |
| 17 |    | MYB(HTH)/ERMYB-Myb-ChIPSeq(GSE22095)/Homer                 | 1e-121 | -2.807e+02 | 0.0000 | 30287.0 | 72.86% | 26724.4 | 67.54% | <a href="#">motif file (matrix)</a> | <a href="#">pdf</a> |  |
| 18 |    | ELF1(ETS)/Jurkat-ELF1-ChIP-Seq/Homer                       | 1e-119 | -2.757e+02 | 0.0000 | 13366.0 | 32.15% | 10677.3 | 26.98% | <a href="#">motif file (matrix)</a> | <a href="#">pdf</a> |  |
| 19 |    | FOXP1(Forkhead)/H9-FOXP1-ChIP-Seq(GSE31006)/Homer          | 1e-118 | -2.733e+02 | 0.0000 | 11849.0 | 28.50% | 9324.9  | 23.57% | <a href="#">motif file (matrix)</a> | <a href="#">pdf</a> |  |
| 20 |  | OCT4-SOX2-TCF-NANOG ((POU/Homeobox/HMG)/mES-ChIP-Seq/Homer | 1e-116 | -2.692e+02 | 0.0000 | 5868.0  | 14.12% | 4152.7  | 10.50% | <a href="#">motif file (matrix)</a> | <a href="#">pdf</a> |  |
| 21 |  | EWS:FLI1-fusion (ETS)/SK_MC-EWS:FLI1-ChIP-Seq/Homer        | 1e-115 | -2.654e+02 | 0.0000 | 14724.0 | 35.42% | 11947.7 | 30.20% | <a href="#">motif file (matrix)</a> | <a href="#">pdf</a> |  |
| 22 |  | ETS(ETS)/Promoter/Homer                                    | 1e-113 | -2.605e+02 | 0.0000 | 8885.0  | 21.37% | 6752.7  | 17.07% | <a href="#">motif file (matrix)</a> | <a href="#">pdf</a> |  |
| 23 |  | EWS:ERG-fusion (ETS)/CADO_ES1-EWS:ERG-ChIP-Seq/Homer       | 1e-110 | -2.538e+02 | 0.0000 | 18273.0 | 43.96% | 15265.8 | 38.58% | <a href="#">motif file (matrix)</a> | <a href="#">pdf</a> |  |
| 24 |                                                                                     | TEAD4(TEA)/Tropoblast-Tead4-ChIP-Seq (GSE37350)/Homer      | 1e-109 | -2.527e+02 | 0.0000 | 21097.0 | 50.75% | 17921.5 | 45.29% | <a href="#">motif file (matrix)</a> | <a href="#">pdf</a> |  |

|    |  |                                                          |        |            |        |         |        |         |        |                                             |                     |  |
|----|--|----------------------------------------------------------|--------|------------|--------|---------|--------|---------|--------|---------------------------------------------|---------------------|--|
|    |  |                                                          |        |            |        |         |        |         |        |                                             |                     |  |
| 25 |  | Oct4(POU/Homeobox)/mES-<br>Oct4-ChIP-Seq/Homer           | 1e-107 | -2.477e+02 | 0.0000 | 12575.0 | 30.25% | 10067.7 | 25.44% | <a href="#">motif<br/>file<br/>(matrix)</a> | <a href="#">pdf</a> |  |
| 26 |  | NF-E2(bZIP)/K562-NFE2-<br>ChIP-Seq/Homer                 | 1e-102 | -2.359e+02 | 0.0000 | 1779.0  | 4.28%  | 978.4   | 2.47%  | <a href="#">motif<br/>file<br/>(matrix)</a> | <a href="#">pdf</a> |  |
| 27 |  | STAT4(Stat)/CD4-Stat4-ChIP-<br>Seq/Homer                 | 1e-100 | -2.317e+02 | 0.0000 | 21618.0 | 52.01% | 18507.6 | 46.77% | <a href="#">motif<br/>file<br/>(matrix)</a> | <a href="#">pdf</a> |  |
| 28 |  | STAT6/Macrophage-Stat6-<br>ChIP-Seq/Homer                | 1e-97  | -2.245e+02 | 0.0000 | 13682.0 | 32.91% | 11160.6 | 28.21% | <a href="#">motif<br/>file<br/>(matrix)</a> | <a href="#">pdf</a> |  |
| 29 |  | Foxa2(Forkhead)/Liver-Foxa2-<br>ChIP-Seq/Homer           | 1e-96  | -2.233e+02 | 0.0000 | 18099.0 | 43.54% | 15236.0 | 38.51% | <a href="#">motif<br/>file<br/>(matrix)</a> | <a href="#">pdf</a> |  |
| 30 |  | ZFX(Zf)/mES-Zfx-ChIP-<br>Seq/Homer                       | 1e-91  | -2.099e+02 | 0.0000 | 28054.0 | 67.49% | 24816.6 | 62.72% | <a href="#">motif<br/>file<br/>(matrix)</a> | <a href="#">pdf</a> |  |
| 31 |  | Stat3+il23(Stat)/CD4-Stat3-<br>ChIP-Seq/Homer            | 1e-90  | -2.075e+02 | 0.0000 | 17289.0 | 41.59% | 14552.5 | 36.78% | <a href="#">motif<br/>file<br/>(matrix)</a> | <a href="#">pdf</a> |  |
| 32 |  | TEAD(TEA)/Fibroblast-<br>PU.1-ChIP-Seq/Homer             | 1e-90  | -2.074e+02 | 0.0000 | 17615.0 | 42.38% | 14856.4 | 37.55% | <a href="#">motif<br/>file<br/>(matrix)</a> | <a href="#">pdf</a> |  |
| 33 |  | Stat3(Stat)/mES-Stat3-ChIP-<br>Seq/Homer                 | 1e-89  | -2.068e+02 | 0.0000 | 13321.0 | 32.05% | 10905.8 | 27.56% | <a href="#">motif<br/>file<br/>(matrix)</a> | <a href="#">pdf</a> |  |
| 34 |  | Bach1(bZIP)/K562-Bach1-<br>ChIP-Seq(GSE31477)/Homer      | 1e-87  | -2.019e+02 | 0.0000 | 1627.0  | 3.91%  | 912.8   | 2.31%  | <a href="#">motif<br/>file<br/>(matrix)</a> | <a href="#">pdf</a> |  |
| 35 |  | Nrf2(bZIP)/Lymphoblast-Nrf2-<br>ChIP-Seq(GSE37589)/Homer | 1e-84  | -1.951e+02 | 0.0000 | 1521.0  | 3.66%  | 844.5   | 2.13%  | <a href="#">motif<br/>file<br/>(matrix)</a> | <a href="#">pdf</a> |  |
| 36 |  | SPDEF(ETS)/VCaP-SPDEF-<br>ChIP-Seq/Homer                 | 1e-84  | -1.937e+02 | 0.0000 | 22633.0 | 54.45% | 19653.7 | 49.67% | <a href="#">motif<br/>file<br/>(matrix)</a> | <a href="#">pdf</a> |  |
| 37 |  | EBF(EBF)/proBcell-EBF-ChIP-<br>Seq/Homer                 | 1e-82  | -1.911e+02 | 0.0000 | 7419.0  | 17.85% | 5702.0  | 14.41% | <a href="#">motif<br/>file<br/>(matrix)</a> | <a href="#">pdf</a> |  |



|    |                                                                                     |                                                |       |            |        |         |        |         |        |                                     |                     |  |
|----|-------------------------------------------------------------------------------------|------------------------------------------------|-------|------------|--------|---------|--------|---------|--------|-------------------------------------|---------------------|--|
|    |    |                                                |       |            |        |         |        |         |        |                                     |                     |  |
| 38 |    | Jun-AP1(bZIP)/K562-cJun-ChIP-Seq/Homer         | 1e-82 | -1.902e+02 | 0.0000 | 6165.0  | 14.83% | 4621.9  | 11.68% | <a href="#">motif file (matrix)</a> | <a href="#">pdf</a> |  |
| 39 |    | AP-1(bZIP)/ThioMac-PU.1-ChIP-Seq/Homer         | 1e-81 | -1.867e+02 | 0.0000 | 16352.0 | 39.34% | 13780.7 | 34.83% | <a href="#">motif file (matrix)</a> | <a href="#">pdf</a> |  |
| 40 |    | HIF1b(HLH)/O785-HIF1b-ChIP-Seq(GSE34871)/Homer | 1e-80 | -1.862e+02 | 0.0000 | 13525.0 | 32.54% | 11181.9 | 28.26% | <a href="#">motif file (matrix)</a> | <a href="#">pdf</a> |  |
| 41 |    | SCL/HPC7-Scl-ChIP-Seq/Homer                    | 1e-72 | -1.670e+02 | 0.0000 | 40765.0 | 98.07% | 38215.6 | 96.58% | <a href="#">motif file (matrix)</a> | <a href="#">pdf</a> |  |
| 42 |    | STAT6(Stat)/CD4-Stat6-ChIP-Seq/Homer           | 1e-70 | -1.627e+02 | 0.0000 | 13459.0 | 32.38% | 11230.4 | 28.38% | <a href="#">motif file (matrix)</a> | <a href="#">pdf</a> |  |
| 43 |    | Foxo1(Forkhead)/RAW-Foxo1-ChIP-Seq/Homer       | 1e-68 | -1.577e+02 | 0.0000 | 33079.0 | 79.58% | 30057.5 | 75.96% | <a href="#">motif file (matrix)</a> | <a href="#">pdf</a> |  |
| 44 |    | MafA(bZIP)/Islet-MafA-ChIP-Seq(GSE30298)/Homer | 1e-67 | -1.548e+02 | 0.0000 | 17043.0 | 41.00% | 14584.0 | 36.86% | <a href="#">motif file (matrix)</a> | <a href="#">pdf</a> |  |
| 45 |    | PU.1(ETS)/ThioMac-PU.1-ChIP-Seq/Homer          | 1e-66 | -1.525e+02 | 0.0000 | 12787.0 | 30.76% | 10665.0 | 26.95% | <a href="#">motif file (matrix)</a> | <a href="#">pdf</a> |  |
| 46 |  | NRF1(NRF)/MCF7-NRF1-ChIP-Seq/Homer             | 1e-65 | -1.514e+02 | 0.0000 | 2897.0  | 6.97%  | 1988.5  | 5.03%  | <a href="#">motif file (matrix)</a> | <a href="#">pdf</a> |  |
| 47 |  | E2F6(E2F)/Hela-E2F6-ChIP-Seq(GSE31477)/Homer   | 1e-64 | -1.493e+02 | 0.0000 | 13830.0 | 33.27% | 11637.9 | 29.41% | <a href="#">motif file (matrix)</a> | <a href="#">pdf</a> |  |
| 48 |  | E2F4(E2F)/K562-E2F4-ChIP-Seq(GSE31477)/Homer   | 1e-64 | -1.477e+02 | 0.0000 | 10909.0 | 26.24% | 8980.6  | 22.70% | <a href="#">motif file (matrix)</a> | <a href="#">pdf</a> |  |
| 49 |  | NFkB-p65(RHD)/GM12787-p65-ChIP-Seq/Homer       | 1e-60 | -1.400e+02 | 0.0000 | 14838.0 | 35.69% | 12615.7 | 31.88% | <a href="#">motif file (matrix)</a> | <a href="#">pdf</a> |  |
| 50 |                                                                                     | Znf263(Zf)/K562-Znf263-ChIP-Seq/Homer          | 1e-59 | -1.364e+02 | 0.0000 | 33373.0 | 80.28% | 30458.6 | 76.98% | <a href="#">motif file (matrix)</a> | <a href="#">pdf</a> |  |

|    |                                                                                      |                                                |       |            |        |         |        |         |        |                                     |                     |  |
|----|--------------------------------------------------------------------------------------|------------------------------------------------|-------|------------|--------|---------|--------|---------|--------|-------------------------------------|---------------------|--|
|    |     |                                                |       |            |        |         |        |         |        |                                     |                     |  |
| 51 |     | STAT5<br>(Stat)/mCD4+-Stat5a b-ChIP-Seq/Homer  | 1e-58 | -1.350e+02 | 0.0000 | 9121.0  | 21.94% | 7428.9  | 18.78% | <a href="#">motif file (matrix)</a> | <a href="#">pdf</a> |  |
| 52 |    | GFY-Staf/Promoters/Homer                       | 1e-57 | -1.325e+02 | 0.0000 | 1592.0  | 3.83%  | 991.2   | 2.51%  | <a href="#">motif file (matrix)</a> | <a href="#">pdf</a> |  |
| 53 |     | Ets1-distal(ETS)/CD4+-PolII-ChIP-Seq/Homer     | 1e-57 | -1.315e+02 | 0.0000 | 7726.0  | 18.59% | 6199.7  | 15.67% | <a href="#">motif file (matrix)</a> | <a href="#">pdf</a> |  |
| 54 |     | CHR/Cell-Cycle-Exp/Homer                       | 1e-55 | -1.280e+02 | 0.0000 | 15989.0 | 38.46% | 13750.8 | 34.75% | <a href="#">motif file (matrix)</a> | <a href="#">pdf</a> |  |
| 55 |     | STAT1(Stat)/HelaS3-STAT1-ChIP-Seq/Homer        | 1e-55 | -1.274e+02 | 0.0000 | 8168.0  | 19.65% | 6610.7  | 16.71% | <a href="#">motif file (matrix)</a> | <a href="#">pdf</a> |  |
| 56 |     | YY1(Zf)/Promoter/Homer                         | 1e-51 | -1.189e+02 | 0.0000 | 2256.0  | 5.43%  | 1544.6  | 3.90%  | <a href="#">motif file (matrix)</a> | <a href="#">pdf</a> |  |
| 57 |     | TATA-Box<br>(TBP)/Promoter/Homer               | 1e-49 | -1.149e+02 | 0.0000 | 26190.0 | 63.00% | 23514.1 | 59.43% | <a href="#">motif file (matrix)</a> | <a href="#">pdf</a> |  |
| 58 |     | Gata4(Zf)/Heart-Gata4-ChIP-Seq(GSE35151)/Homer | 1e-48 | -1.109e+02 | 0.0000 | 21199.0 | 51.00% | 18757.2 | 47.41% | <a href="#">motif file (matrix)</a> | <a href="#">pdf</a> |  |
| 59 |   | Lhx3(Homeobox)/Forebrain-p300-ChIP-Seq/Homer   | 1e-46 | -1.064e+02 | 0.0000 | 21457.0 | 51.62% | 19032.6 | 48.10% | <a href="#">motif file (matrix)</a> | <a href="#">pdf</a> |  |
| 60 |   | Smad2(MAD)/ES-SMAD2-ChIP-Seq(GSE29422)/Homer   | 1e-41 | -9.571e+01 | 0.0000 | 29203.0 | 70.25% | 26569.5 | 67.15% | <a href="#">motif file (matrix)</a> | <a href="#">pdf</a> |  |
| 61 |  | Tcfcp211(CP2)/mES-Tcfcp211-ChIP-Seq/Homer      | 1e-41 | -9.563e+01 | 0.0000 | 3753.0  | 9.03%  | 2865.8  | 7.24%  | <a href="#">motif file (matrix)</a> | <a href="#">pdf</a> |  |
| 62 |   | Sp1(Zf)/Promoter/Homer                         | 1e-41 | -9.443e+01 | 0.0000 | 8664.0  | 20.84% | 7218.9  | 18.24% | <a href="#">motif file (matrix)</a> | <a href="#">pdf</a> |  |
| 63 |                                                                                      | Gata2(Zf)/K562-GATA2-ChIP-Seq/Homer            | 1e-40 | -9.434e+01 | 0.0000 | 15036.0 | 36.17% | 13072.9 | 33.04% | <a href="#">motif file (matrix)</a> | <a href="#">pdf</a> |  |

|    |                                                                                     |                                               |       |            |        |         |        |         |        |                                     |                     |  |
|----|-------------------------------------------------------------------------------------|-----------------------------------------------|-------|------------|--------|---------|--------|---------|--------|-------------------------------------|---------------------|--|
|    |    |                                               |       |            |        |         |        |         |        |                                     |                     |  |
| 64 |    | PU.1-IRF/Bcell-PU.1-ChIP-Seq/Homer            | 1e-40 | -9.371e+01 | 0.0000 | 27971.0 | 67.29% | 25382.9 | 64.15% | <a href="#">motif file (matrix)</a> | <a href="#">pdf</a> |  |
| 65 |    | NFAT(RHD)/Jurkat-NFATC1-ChIP-Seq/Homer        | 1e-40 | -9.276e+01 | 0.0000 | 20350.0 | 48.95% | 18076.1 | 45.68% | <a href="#">motif file (matrix)</a> | <a href="#">pdf</a> |  |
| 66 |    | EGR(Zf)/K562-EGR1-ChIP-Seq/Homer              | 1e-40 | -9.211e+01 | 0.0000 | 5698.0  | 13.71% | 4576.1  | 11.57% | <a href="#">motif file (matrix)</a> | <a href="#">pdf</a> |  |
| 67 |    | RXR(NR/DR1)/3T3L1-RXR-ChIP-Seq/Homer          | 1e-38 | -8.931e+01 | 0.0000 | 25156.0 | 60.52% | 22691.8 | 57.35% | <a href="#">motif file (matrix)</a> | <a href="#">pdf</a> |  |
| 68 |    | Gata1(Zf)/K562-GATA1-ChIP-Seq/Homer           | 1e-36 | -8.343e+01 | 0.0000 | 13513.0 | 32.51% | 11731.4 | 29.65% | <a href="#">motif file (matrix)</a> | <a href="#">pdf</a> |  |
| 69 |    | Nanog(Homeobox)/mES-Nanog-ChIP-Seq/Homer      | 1e-34 | -8.045e+01 | 0.0000 | 40506.0 | 97.44% | 38127.5 | 96.36% | <a href="#">motif file (matrix)</a> | <a href="#">pdf</a> |  |
| 70 |    | AR-halfsite(NR)/LNCaP-AR-ChIP-Seq/Homer       | 1e-34 | -7.988e+01 | 0.0000 | 39987.0 | 96.19% | 37556.8 | 94.92% | <a href="#">motif file (matrix)</a> | <a href="#">pdf</a> |  |
| 71 |    | Oct2(POU/Homeobox)/Bcell-Oct2-ChIP-Seq/Homer  | 1e-32 | -7.585e+01 | 0.0000 | 8304.0  | 19.98% | 6998.6  | 17.69% | <a href="#">motif file (matrix)</a> | <a href="#">pdf</a> |  |
| 72 |  | Smad4(MAD)/ESC-SMAD4-ChIP-Seq(GSE29422)/Homer | 1e-32 | -7.463e+01 | 0.0000 | 29389.0 | 70.70% | 26901.2 | 67.99% | <a href="#">motif file (matrix)</a> | <a href="#">pdf</a> |  |
| 73 |  | PR(NR)/T47D-PR-ChIP-Seq(GSE31130)/Homer       | 1e-32 | -7.461e+01 | 0.0000 | 33815.0 | 81.35% | 31256.9 | 79.00% | <a href="#">motif file (matrix)</a> | <a href="#">pdf</a> |  |
| 74 |  | Hoxc9/Ainv15-Hoxc9-ChIP-Seq/Homer             | 1e-31 | -7.281e+01 | 0.0000 | 12157.0 | 29.25% | 10550.6 | 26.66% | <a href="#">motif file (matrix)</a> | <a href="#">pdf</a> |  |
| 75 |  | NRF1/Promoter/Homer                           | 1e-31 | -7.273e+01 | 0.0000 | 3546.0  | 8.53%  | 2773.8  | 7.01%  | <a href="#">motif file (matrix)</a> | <a href="#">pdf</a> |  |
| 76 |                                                                                     | HOXA9/HSC-Hoxa9-ChIP-Seq(GSE33509)/Homer      | 1e-31 | -7.221e+01 | 0.0000 | 15133.0 | 36.40% | 13321.7 | 33.67% | <a href="#">motif file (matrix)</a> | <a href="#">pdf</a> |  |

|    |                                                                                     |                                                        |       |            |        |         |        |         |        |                                     |                     |  |
|----|-------------------------------------------------------------------------------------|--------------------------------------------------------|-------|------------|--------|---------|--------|---------|--------|-------------------------------------|---------------------|--|
|    |    |                                                        |       |            |        |         |        |         |        |                                     |                     |  |
| 77 |    | Egr2/Thymocytes-Egr2-ChIP-Seq(GSE34254)/Homer          | 1e-29 | -6.857e+01 | 0.0000 | 5032.0  | 12.11% | 4098.4  | 10.36% | <a href="#">motif file (matrix)</a> | <a href="#">pdf</a> |  |
| 78 |    | PPARE(NR/DR1)/3T3L1-Pparg-ChIP-Seq/Homer               | 1e-28 | -6.591e+01 | 0.0000 | 22428.0 | 53.95% | 20263.5 | 51.21% | <a href="#">motif file (matrix)</a> | <a href="#">pdf</a> |  |
| 79 |    | MyoD(HLH)/Myotube-MyoD-ChIP-Seq/Homer                  | 1e-28 | -6.569e+01 | 0.0000 | 17566.0 | 42.26% | 15656.7 | 39.57% | <a href="#">motif file (matrix)</a> | <a href="#">pdf</a> |  |
| 80 |    | GATA3(Zf)/iTreg-Gata3-ChIP-Seq(GSE20898)/Homer         | 1e-28 | -6.454e+01 | 0.0000 | 27694.0 | 66.62% | 25335.5 | 64.03% | <a href="#">motif file (matrix)</a> | <a href="#">pdf</a> |  |
| 81 |    | NF1-halfsite(CTF)/LNCaP-NF1-ChIP-Seq/Homer             | 1e-27 | -6.238e+01 | 0.0000 | 31007.0 | 74.59% | 28577.9 | 72.23% | <a href="#">motif file (matrix)</a> | <a href="#">pdf</a> |  |
| 82 |    | Six1(Homeobox)/Myoblast-Six1-ChIP-Chip(GSE20150)/Homer | 1e-26 | -6.163e+01 | 0.0000 | 6358.0  | 15.30% | 5323.8  | 13.45% | <a href="#">motif file (matrix)</a> | <a href="#">pdf</a> |  |
| 83 |    | Nr5a2(NR)/mES-Nr5a2-ChIP-Seq/Homer                     | 1e-25 | -5.868e+01 | 0.0000 | 13133.0 | 31.59% | 11564.4 | 29.23% | <a href="#">motif file (matrix)</a> | <a href="#">pdf</a> |  |
| 84 |    | Smad3(MAD)/NPC-Smad3-ChIP-Seq(GSE36673)/Homer          | 1e-25 | -5.764e+01 | 0.0000 | 37819.0 | 90.98% | 35389.5 | 89.44% | <a href="#">motif file (matrix)</a> | <a href="#">pdf</a> |  |
| 85 |  | IRF4(IRF)/GM12878-IRF4-ChIP-Seq/Homer                  | 1e-24 | -5.669e+01 | 0.0000 | 10965.0 | 26.38% | 9569.2  | 24.18% | <a href="#">motif file (matrix)</a> | <a href="#">pdf</a> |  |
| 86 |  | FOXA1(Forkhead)/LNCaP-FOXA1-ChIP-Seq/Homer             | 1e-24 | -5.555e+01 | 0.0000 | 24644.0 | 59.28% | 22476.4 | 56.80% | <a href="#">motif file (matrix)</a> | <a href="#">pdf</a> |  |
| 87 |  | HNF4a(NR/DR1)/HepG2-HNF4a-ChIP-Seq/Homer               | 1e-23 | -5.490e+01 | 0.0000 | 11575.0 | 27.85% | 10148.1 | 25.65% | <a href="#">motif file (matrix)</a> | <a href="#">pdf</a> |  |
| 88 |  | GFY(?)/Promoter/Homer                                  | 1e-23 | -5.317e+01 | 0.0000 | 1998.0  | 4.81%  | 1515.7  | 3.83%  | <a href="#">motif file (matrix)</a> | <a href="#">pdf</a> |  |
| 89 |                                                                                     | Foxh1(Forkhead)/hESC-FOXH1-ChIP-Seq(GSE29422)/Homer    | 1e-22 | -5.192e+01 | 0.0000 | 14582.0 | 35.08% | 12975.8 | 32.79% | <a href="#">motif file (matrix)</a> | <a href="#">pdf</a> |  |

|    |                                                                                    |                                               |       |            |        |         |        |         |        |                                     |                     |  |  |
|----|------------------------------------------------------------------------------------|-----------------------------------------------|-------|------------|--------|---------|--------|---------|--------|-------------------------------------|---------------------|--|--|
|    |   |                                               |       |            |        |         |        |         |        |                                     |                     |  |  |
| 90 |   | PRDM14(Zf)/H1-PRDM14-ChIP-Seq/Homer           | 1e-21 | -4.935e+01 | 0.0000 | 7830.0  | 18.84% | 6742.5  | 17.04% | <a href="#">motif file (matrix)</a> | <a href="#">pdf</a> |  |  |
| 91 |  | NFAT:API/Jurkat-NFATC1-ChIP-Seq/Homer         | 1e-20 | -4.785e+01 | 0.0000 | 4929.0  | 11.86% | 4120.8  | 10.41% | <a href="#">motif file (matrix)</a> | <a href="#">pdf</a> |  |  |
| 92 |   | RFX(HTH)/K562-RFX3-ChIP-Seq/Homer             | 1e-20 | -4.776e+01 | 0.0000 | 1941.0  | 4.67%  | 1487.0  | 3.76%  | <a href="#">motif file (matrix)</a> | <a href="#">pdf</a> |  |  |
| 93 |   | Tcf12(HLH)/GM12878-Tcf12-ChIP-Seq/Homer       | 1e-20 | -4.751e+01 | 0.0000 | 21322.0 | 51.29% | 19381.1 | 48.98% | <a href="#">motif file (matrix)</a> | <a href="#">pdf</a> |  |  |
| 94 |   | ETS:E-box/HPC7-Scl-ChIP-Seq/Homer             | 1e-20 | -4.687e+01 | 0.0000 | 2649.0  | 6.37%  | 2102.7  | 5.31%  | <a href="#">motif file (matrix)</a> | <a href="#">pdf</a> |  |  |
| 95 |   | Pdx1(Homeobox)/Islet-Pdx1-ChIP-Seq/Homer      | 1e-20 | -4.679e+01 | 0.0000 | 19327.0 | 46.49% | 17494.8 | 44.21% | <a href="#">motif file (matrix)</a> | <a href="#">pdf</a> |  |  |
| 96 |   | MyoG(HLH)/C2C12-MyoG-ChIP-Seq(GSE36024)/Homer | 1e-20 | -4.615e+01 | 0.0000 | 22509.0 | 54.15% | 20526.2 | 51.88% | <a href="#">motif file (matrix)</a> | <a href="#">pdf</a> |  |  |
| 97 |   | E2F(E2F)/Cell-Cycle-Exp/Homer                 | 1e-20 | -4.615e+01 | 0.0000 | 1343.0  | 3      |         |        |                                     |                     |  |  |
