# Supplementary material for: Seminoma and Embryonal Carcinoma Footprints Identified by Analysis of Integrated Genome-Wide Epigenetic and Expression Profiles of Germ Cell Cancer Cell Lines
Source: PLoS One. 2014 Jun 2;9(6):e98330. doi: 10.1371/journal.pone.0098330 (PMC4041891; doi:10.1371/journal.pone.0098330)
Supplement: Table S2 — Results of IPA/functional analysis of (differentiating) gene lists. IPA was performed using the default settings including “testis” as specific tissue of interest, and only incorporating experimentally observed evidence. Green fill indicates overlap between TCam-2 and NCCIT. Reported log(p) values are the result of IPA's internal enrichment tests. (XLSX) [file pone.0098330.s006.xlsx]

## Sheet: TCAM-2.histone.mod
Histone modifications TCam-2: Enriched for H3K4Me3 or H3K27Ac
Enriched functions	p-value	Enriched canonical pathways	log-p-value	Functional networks
abnormal morphology of epididymis	0.03	IGF-1 Signaling	3.42
aneuploidy of spermatocytes	0.0305	Role of JAK family kinases in IL-6-type Cytokine Signaling	2.64
cell death of germ cells	0.0434	NADH Repair	2.57
clearance of germ cells	0.0305	Mouse Embryonic Stem Cell Pluripotency	2.24
development of granulosa cell tumor	0.0305	Gα12/13 Signaling	2.21
disruption of seminiferous epithelium	0.0305	Aryl Hydrocarbon Receptor Signaling	2.17
granulosa cell tumor	0.0305	Germ Cell-Sertoli Cell Junction Signaling	2.11
lack of efferent ductule of testis	0.0305	HGF Signaling	2.09
lack of seminal vesicle	0.0176	CXCR4 Signaling	2.09
lack of vas deferens	0.0087	Thyroid Cancer Signaling	2.01
phagocytosis of spermatogenic cells	0.0305	Glioma Invasiveness Signaling	1.91
quantity of apoptotic germ cells	0.000925	α-Adrenergic Signaling	1.9
quantity of apoptotic spermatogenic cells	0.0305	BMP signaling pathway	1.83
		T Helper Cell Differentiation	1.81
		Regulation of Cellular Mechanics by Calpain Protease	1.81
		RAR Activation	1.79
		CDK5 Signaling	1.76
		PPARα/RXRα Activation	1.75
		ERK/MAPK Signaling	1.73
		Colorectal Cancer Metastasis Signaling	1.68
		Chemokine Signaling	1.64
		IL-6 Signaling	1.63
		Oncostatin M Signaling	1.61
		Insulin Receptor Signaling	1.61
		Acute Phase Response Signaling	1.59
		Regulation of the Epithelial-Mesenchymal Transition Pathway	1.55
		Role of NANOG in Mammalian Embryonic Stem Cell Pluripotency	1.54
		Agrin Interactions at Neuromuscular Junction	1.52
		Glutamine Biosynthesis I	1.52
		Palmitate Biosynthesis I (Animals)	1.52
		Fatty Acid Biosynthesis Initiation II	1.52
		Cholecystokinin/Gastrin-mediated Signaling	1.48
		Cardiomyocyte Differentiation via BMP Receptors	1.45
		Prolactin Signaling	1.39
		Leptin Signaling in Obesity	1.39
		Ephrin B Signaling	1.39
		Phosphatidylglycerol Biosynthesis II (Non-plastidic)	1.37
		Melanoma Signaling	1.36
		PXR/RXR Activation	1.36
		Role of NFAT in Cardiac Hypertrophy	1.35
		JAK/Stat Signaling	1.33
		Renin-Angiotensin Signaling	1.32

## Sheet: NCCIT.histone.mod
Histone modifications NCCIT: Enriched for H3K4Me3 or H3K27Ac
Enriched functions	p-value	Enriched canonical pathways	log-p-value	Functional networks
none		EIF2 Signaling	7.21E00
		Protein Ubiquitination Pathway	1.87E00
		Geranylgeranyldiphosphate Biosynthesis	1.67E00
		Mouse Embryonic Stem Cell Pluripotency	1.56E00
		Role of Oct4 in Mammalian Embryonic Stem Cell Pluripotency	1.56E00
		Regulation of eIF4 and p70S6K Signaling	1.47E00
		NRF2-mediated Oxidative Stress Response	1.46E00
		TCA Cycle II (Eukaryotic)	1.4E00
		Selenocysteine Biosynthesis II (Archaea and Eukaryotes)	1.37E00
		Trans, trans-farnesyl Diphosphate Biosynthesis	1.37E00
		DNA Methylation and Transcriptional Repression Signaling	1.35E00

## Sheet: TCam-2.methylation
Hypomethylation TCam-2
Enriched functions	p-value	Enriched canonical pathways	log-p-value	Functional networks
presence of spermatocytes	6.21E-03	GDP-L-fucose Biosynthesis II (from L-fucose)	1.91E00
abnormal morphology of Sertoli cells	1.47E-02	TNFR1 Signaling	1.89E00
concentration of androstenedione	1.85E-02	Role of Oct4 in Mammalian Embryonic Stem Cell Pluripotency	1.81E00
concentration of progesterone	1.85E-02	Aldosterone Signaling in Epithelial Cells	1.74E00
degeneration of seminiferous tubule	2.53E-02	NAD Phosphorylation and Dephosphorylation	1.73E00
abnormal morphology of seminiferous tubule	2.57E-02	Angiopoietin Signaling	1.6E00
function of testis	3.67E-02	Toll-like Receptor Signaling	1.58E00
mass of testis	3.79E-02	Purine Nucleotides De Novo Biosynthesis II	1.51E00
morphology of testis	4.93E-02	Regulation of Actin-based Motility by Rho	1.5E00
		Small Cell Lung Cancer Signaling	1.5E00
		Choline Biosynthesis III	1.44E00
		Antioxidant Action of Vitamin C	1.37E00
		Primary Immunodeficiency Signaling	1.37E00
		Urate Biosynthesis/Inosine 5'-phosphate Degradation	1.37E00
		Purine Nucleotides Degradation II (Aerobic)	1.37E00

## Sheet: NCCIT.methylation
Hypomethylation NCCIT
Enriched functions	p-value	Enriched canonical pathways	log-p-value	Functional networks
atrophy of testis	1.07E-03	Embryonic Stem Cell Differentiation into Cardiac Lineages	4.4E00
abnormal morphology of testis	3.17E-02	Role of NANOG in Mammalian Embryonic Stem Cell Pluripotency	3.71E00
		Transcriptional Regulatory Network in Embryonic Stem Cells	3.13E00
		Glycine Degradation (Creatine Biosynthesis)	2.38E00
		Mouse Embryonic Stem Cell Pluripotency	2.27E00
		NADH Repair	2.21E00
		Mismatch Repair in Eukaryotes	1.73E00
		Cardiomyocyte Differentiation via BMP Receptors	1.69E00

## Sheet: TCam-2.expression
Expression TCam-2
Enriched functions	p-value	Enriched canonical pathways	log-p-value	Functional networks
accumulation of beta-estradiol	1.30E-02	Regulation of Actin-based Motility by Rho	2.58E00
delay in initiation of development of Leydig cells	1.30E-02	RhoGDI Signaling	2.22E00
diameter of adipocytes	1.30E-02	Leukocyte Extravasation Signaling	2.1E00
formation of efferent ductule of testis	1.30E-02	Agranulocyte Adhesion and Diapedesis	1.9E00
formation of gland	1.30E-02	Estrogen-mediated S-phase Entry	1.75E00
formation of vas deferens	1.30E-02	Signaling by Rho Family GTPases	1.74E00
fragmentation of DNA fragment	1.30E-02	Bladder Cancer Signaling	1.62E00
mobilization of Ca2+	1.30E-02	Glycogen Degradation II	1.59E00
accumulation of cyclic AMP	2.58E-02	Aryl Hydrocarbon Receptor Signaling	1.51E00
apoptosis of adipocytes	2.58E-02	Germ Cell-Sertoli Cell Junction Signaling	1.48E00
atrophy of testicular cells	2.58E-02	Wnt/β-catenin Signaling	1.45E00
concentration of cyclic AMP	2.58E-02	Glioma Signaling	1.45E00
hydrolysis of triacylglycerol	2.58E-02	Glycogen Degradation III	1.42E00
proliferation of Leydig precursor cells	2.58E-02	p53 Signaling	1.37E00
quantity of Ca2+	2.58E-02	Melanoma Signaling	1.35E00
quantity of adipocytes	2.58E-02	RhoA Signaling	1.32E00
size of fat pad	2.58E-02	Pentose Phosphate Pathway (Non-oxidative Branch)	1.29E00
synthesis of dihydrotestosterone	2.58E-02	Sertoli Cell-Sertoli Cell Junction Signaling	1.29E00
size of epididymis	3.84E-02
steroidogenesis of Leydig cells	3.84E-02
tubulation of Sertoli cells	3.84E-02

## Sheet: NCCIT.expression
Expression NCCIT
Enriched functions	p-value	Enriched canonical pathways	log-p-value	Functional networks
abnormal morphology of enlarged seminal vesicle	8.28E-03	Urea Cycle	3.4E00
infiltration by macrophages	8.28E-03	Wnt/β-catenin Signaling	2.95E00
quantity of prospermatogonia	8.28E-03	Glutathione Redox Reactions I	2.86E00
reassembly of tight junctions	8.28E-03	Superpathway of Citrulline Metabolism	2.54E00
resealing of tight junctions	8.28E-03	Guanine and Guanosine Salvage I	2.08E00
		Adenine and Adenosine Salvage III	2.08E00
		Glycogen Biosynthesis II (from UDP-D-Glucose)	2.08E00
		Fatty Acid β-oxidation III (Unsaturated, Odd Number)	1.78E00
		Role of Oct4 in Mammalian Embryonic Stem Cell Pluripotency	1.57E00
		Arginine Biosynthesis IV	1.49E00
		Role of CHK Proteins in Cell Cycle Checkpoint Control	1.45E00
		Embryonic Stem Cell Differentiation into Cardiac Lineages	1.39E00
		Citrulline-Nitric Oxide Cycle	1.39E00
		CTLA4 Signaling in Cytotoxic T Lymphocytes	1.33E00

## Sheet: TCam-2.integrated
Integrated TCam-2
Enriched functions	p-value	Enriched canonical pathways	log-p-value	Functional networks
abnormal morphology of seminal vesicle	0.0386	EIF2 Signaling	17.8
		Mitochondrial Dysfunction	12.1
		Regulation of eIF4 and p70S6K Signaling	8.38
		Protein Ubiquitination Pathway	8.04
		Remodeling of Epithelial Adherens Junctions	6.13
		mTOR Signaling	5.97
		RAN Signaling	3.61
		Hypoxia Signaling in the Cardiovascular System	3.35
		Epithelial Adherens Junction Signaling	3.16
		Signaling by Rho Family GTPases	2.96
		Regulation of Actin-based Motility by Rho	2.95
		Cysteine Biosynthesis III (mammalia)	2.66
		Fcγ Receptor-mediated Phagocytosis in Macrophages and Monocytes	2.6
		tRNA Charging	2.5
		Actin Nucleation by ARP-WASP Complex	2.47
		RhoGDI Signaling	2.43
		NRF2-mediated Oxidative Stress Response	2.26
		Clathrin-mediated Endocytosis Signaling	2.2
		Methionine Degradation I (to Homocysteine)	2.08
		HIF1α Signaling	2.03
		Superpathway of Methionine Degradation	2.02
		Vitamin-C Transport	1.87
		TCA Cycle II (Eukaryotic)	1.85
		Superpathway of Cholesterol Biosynthesis	1.85
		Integrin Signaling	1.82
		Cdc42 Signaling	1.81
		Breast Cancer Regulation by Stathmin1	1.75
		Rac Signaling	1.73
		Cyclins and Cell Cycle Regulation	1.73
		Granzyme A Signaling	1.73
		Renal Cell Carcinoma Signaling	1.72
		Lipid Antigen Presentation by CD1	1.69
		Ascorbate Recycling (Cytosolic)	1.68
		Ephrin Receptor Signaling	1.65
		Mitotic Roles of Polo-Like Kinase	1.56
		Huntington's Disease Signaling	1.55
		Cholesterol Biosynthesis I	1.52
		Cholesterol Biosynthesis II (via 24,25-dihydrolanosterol)	1.52
		Cholesterol Biosynthesis III (via Desmosterol)	1.52
		Aldosterone Signaling in Epithelial Cells	1.52
		CD28 Signaling in T Helper Cells	1.45
		fMLP Signaling in Neutrophils	1.41
		Pentose Phosphate Pathway	1.37
		Methylglyoxal Degradation III	1.37
		Germ Cell-Sertoli Cell Junction Signaling	1.34

## Sheet: NCCIT.integrated
Integrated NCCIT
Enriched functions	p-value	Enriched canonical pathways	log-p-value	Functional networks
degeneration of germ cells	1.68E-02	EIF2 Signaling	1.32E01
		Protein Ubiquitination Pathway	7.87E00
		Mitochondrial Dysfunction	6.87E00
		Regulation of eIF4 and p70S6K Signaling	5.96E00
		mTOR Signaling	4.61E00
		tRNA Charging	4.4E00
		RAN Signaling	3.94E00
		Remodeling of Epithelial Adherens Junctions	3.04E00
		Superpathway of Methionine Degradation	2.99E00
		Hypoxia Signaling in the Cardiovascular System	2.82E00
		Cell Cycle: G2/M DNA Damage Checkpoint Regulation	2.67E00
		Caveolar-mediated Endocytosis Signaling	2.54E00
		Superpathway of Geranylgeranyldiphosphate Biosynthesis I (via Mevalonate)	2.47E00
		Regulation of Actin-based Motility by Rho	2.44E00
		Methionine Degradation I (to Homocysteine)	2.28E00
		Cyclins and Cell Cycle Regulation	2.12E00
		TCA Cycle II (Eukaryotic)	2.08E00
		Superpathway of Cholesterol Biosynthesis	2.08E00
		Cysteine Biosynthesis III (mammalia)	2.07E00
		DNA Methylation and Transcriptional Repression Signaling	1.93E00
		Mitotic Roles of Polo-Like Kinase	1.88E00
		Cdc42 Signaling	1.84E00
		Branched-chain α-keto acid Dehydrogenase Complex	1.77E00
		Cardiolipin Biosynthesis II	1.77E00
		Trans, trans-farnesyl Diphosphate Biosynthesis	1.77E00
		Mevalonate Pathway I	1.75E00
		Valine Degradation I	1.75E00
		RhoGDI Signaling	1.69E00
		Signaling by Rho Family GTPases	1.55E00
		NRF2-mediated Oxidative Stress Response	1.46E00
		Cell Cycle: G1/S Checkpoint Regulation	1.41E00
		Role of Oct4 in Mammalian Embryonic Stem Cell Pluripotency	1.4E00
		Ephrin B Signaling	1.35E00
		Superpathway of Serine and Glycine Biosynthesis I	1.34E00
		Serine Biosynthesis	1.34E00
		2-oxobutanoate Degradation I	1.34E00
		Glycolysis I	1.33E00
